# Supplementary material for: Highly frustrated liquid crystal phases in optically active dimers: synthesis and rich phase transitional behavior
Source: Royal Society of Chemistry journal article supplement (doi:10.1039/c8nj03520b), 2018-12-20
Supplement: c8nj03520b1.pdf [file c8nj03520b1.pdf]

## Highly Frustrated Liquid Crystal Phases in Optically Active Dimers: Synthesis and Rich Phase Transitional Behavior

Rashmi Ashwathama Nayak\*<sup>a,b</sup>, Sachin A. Bhat<sup>a</sup>, G. Shanker,<sup>c</sup> D. S. Shankar Rao and  
C. V. Yelamaggad\*<sup>a</sup>

<sup>a</sup> Centre for Nano and Soft Matter Sciences  
P. B. No. 1329, Prof. U. R. Rao Road, Jalahalli, Bengaluru 560013, India  
E-mail: [yelamaggad@cens.res.in](mailto:yelamaggad@cens.res.in)/ [yelamaggad@gmail.com](mailto:yelamaggad@gmail.com)

<sup>b</sup> Present address: CSIR-National Chemical Laboratory,  
Dr. Homi Bhabha Road, Pune- 411 008, India.

<sup>c</sup>Department of Chemistry, Jnana Bharathi Campus, Sneha Bhavan, Bangalore University,  
Bengaluru 560056, India

### I. Experimental

#### Ia. General Information

The starting chemicals such as cholesterol, 4-hydroxybenzaldehyde, 4-nitrophenol, 4-bromobutyric acid, 5-bromovaleric acid, 6-bromocaproic acid and 8-bromocaprylic acid were procured from an overseas company, and were used as received. The bulk solvents were purchased from the local sources which were purified by standard methods. Thin layer chromatography (TLC) plates, consisting of a thin layer of silica gel (Merck, Kieselgel60, F254) on an aluminium foil backing, were used to monitor the progress and completion of reactions; TLC plates were also employed to assess the purity of the intermediates. Column chromatography technique was used to purify the intermediates wherein silica gel (100-200 mesh) and neutral alumina were used as stationary phases. UV-Vis spectroscopy was performed using a Perkin Elmer Lambda 20 UV-Vis spectrometer. Perkin Elmer Spectrum 1000 FT-IR spectrometer was employed to record IR spectra of the samples using KBr pellets; the X-axes of IR spectra are plotted in wavenumber ( $\text{cm}^{-1}$ ) unit.  $^1\text{H}$  and  $^{13}\text{C}$  NMR spectra of the samples were recorded in  $\text{CDCl}_3$  at ambient temperature on a Bruker AMX-400 (400 MHz) spectrometer. The chemical shifts ( $\delta$ ) are reported in parts per million using the solvent residual peak as an internal standard. Coupling constants ( $J$  values) are reported in Hz. FAB mass spectra were recorded on a JEOL JMS-600H mass spectrometer where 3-nitrobenzyl alcohol was used as a liquid matrix and a Perkin Elmer Elemental Analyzer Series II 2400 and Carlo-Erba Flash 1112 analyzers were used for elemental analysis. The thermal properties of the dimers and some of the key intermediates were examined with the help of an Olympus BX50 (Model BX50F4) optical polarizing microscope, attached to a

digital camera and a Mettler FP82HT hot stage programmed by an FP90 Central Processor, and Perkin-Elmer Diamond differential scanning calorimeter (DSC). Prior to use the DSC was calibrated using pure indium as a standard. DSC thermograms were recorded at a scanning rate of 5 °C/min. X-Ray diffraction (XRD) studies with  $\text{CuK}\alpha$  ( $\lambda = 0.15418 \text{ nm}$ ) radiation were carried out using a powder X-ray diffractometer viz., PANalytical X'Pert PRO MP machine consisting of a focusing elliptical mirror and a fast resolution detector (PIXCEL); the chosen sample for this study was placed into a Lindemann glass capillary (0.5 mm diameter), and the capillary was then carefully flame sealed at both the ends. CD spectra were obtained with the help of Jasco J-810 spectropolarimeter.

#### **Ib. General Procedure for the synthesis of cholesteryl $\omega$ -bromoalkanoates (**1a-d**)**

In a round bottom flask  $\omega$ -bromoalkanoic acid (12.9 mmol, 1 equiv.) was taken, 12ml of oxalyl chloride was added and stirred at rt for 4h under nitrogen atmosphere. The excess of oxalyl chloride was distilled out under reduced pressure and the  $\omega$ -bromoalkanoyl chloride obtained was dried under *vacuo* and added dropwise to a solution of cholesterol (5g, 12.9 mmol, 1 equiv.) in pyridine (6 ml) and dry THF (50 ml) at 0° C. The reaction mixture was warmed to rt and stirred for 12 h. The reaction mixture was filtered on celite bed and the filtrate was concentrated to obtain a pale yellow mass which was dissolved in a mixture of  $\text{CH}_2\text{Cl}_2$  and  $\text{Et}_2\text{O}$  (20:80). The organic layer was thoroughly washed with water, brine and dried over anhyd.  $\text{Na}_2\text{SO}_4$ . The crude mass obtained upon evaporation of the solvent was purified by column chromatography using neutral alumina. Elution with a mixture of 30%  $\text{CH}_2\text{Cl}_2$ -hexanes afforded the pure product.

#### Cholesteryl 4-bromobutanoate: **1a**

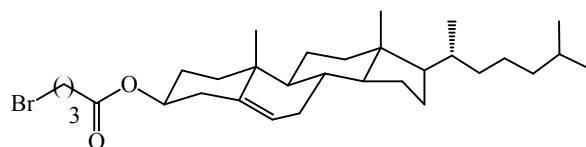

$R_f = 0.33$  in 30%  $\text{CH}_2\text{Cl}_2$ -hexanes; a white solid; yield: 5.67g, 82 %; m.p.: 87.6 °C; IR (KBr Pellet):  $\nu_{\text{max}}$  in  $\text{cm}^{-1}$  2948, 2866, 1733, 1465, 1171, 1027;  $^1\text{H NMR}$  (400MHz,  $\text{CDCl}_3$ ):  $\delta$  5.38 (brd,  $J = 4.0 \text{ Hz}$ , 1H, 1  $\times$  olefinic), 4.66 (m, 1H, 1  $\times$  CHOCO), 3.48 (t,  $J = 6.4 \text{ Hz}$ , 2H, 1  $\times$   $\text{CH}_2\text{Br}$ ), 2.49 (m, 4H, 2  $\times$  allylic  $\text{CH}_2$ ), 2.03-1.05 (m, 28H, 11  $\times$   $\text{CH}_2$ , 6  $\times$  CH), 1.02 (s, 3H, 1  $\times$   $\text{CH}_3$ ), 0.92 (d,  $J = 6.8 \text{ Hz}$ , 3H, 1  $\times$   $\text{CH}_3$ ), 0.88 (d,  $J = 1.6 \text{ Hz}$ , 3H, 1  $\times$   $\text{CH}_3$ ), 0.86 (d,  $J = 2.0$

Hz, 3H, 1 × CH<sub>3</sub>), 0.68 (s, 3H, 1 × CH<sub>3</sub>); MS (FAB+): m/z calcd for C<sub>31</sub>H<sub>53</sub>BrO<sub>2</sub> (M+2) : 536.3. Found: 536.2.

**1b:** Cholesteryl 5-bromopentanoate

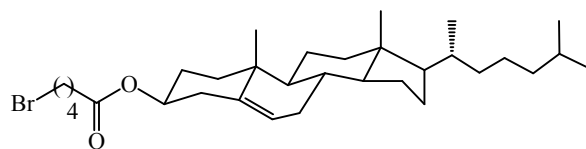

$R_f$  = 0.33 in 30% CH<sub>2</sub>Cl<sub>2</sub>-hexanes; a white solid; yield: 5.96g, 84 %; m.p.: 100.57 °C; IR (KBr Pellet):  $\nu_{\max}$  in cm<sup>-1</sup> 2944, 2868, 1733, 1463, 1174, 1000; <sup>1</sup>H NMR (400MHz, CDCl<sub>3</sub>):  $\delta$  5.38 (brd,  $J$  = 4.0 Hz, 1H, 1 × olefinic), 4.63 (m, 1H, 1 × CHOCO), 3.42 (t,  $J$  = 6.8 Hz, 2H, 1 × CH<sub>2</sub>Br), 2.32 (m, 4H, 2 × allylic CH<sub>2</sub>), 2.02-1.06 (m, 30H, 12 × CH<sub>2</sub>, 6 × CH), 1.02 (s, 3H, 1 × CH<sub>3</sub>), 0.92 (d,  $J$  = 6.5 Hz, 3H, 1 × CH<sub>3</sub>), 0.87 (d,  $J$  = 1.8 Hz, 3H, 1 × CH<sub>3</sub>), 0.86 (d,  $J$  = 1.8 Hz, 3H, 1 × CH<sub>3</sub>), 0.68 (s, 3H, 1 × CH<sub>3</sub>); MS (FAB+): m/z calcd for C<sub>32</sub>H<sub>54</sub>BrO<sub>2</sub> (M+1): 549.3. Found: 549.3.

**1c:** Cholesteryl 6-bromohexanoate

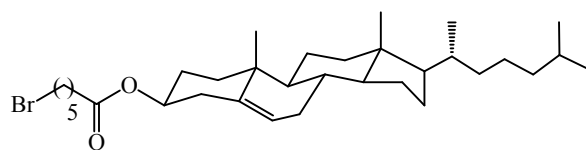

$R_f$  = 0.33 in 30% CH<sub>2</sub>Cl<sub>2</sub>-hexanes; a white solid; yield: 6.33g, 87 %; m.p.: 100.57 °C; IR (KBr Pellet):  $\nu_{\max}$  in cm<sup>-1</sup> 2949, 2863, 1733, 1465, 1175, 1020; <sup>1</sup>H NMR (400MHz, CDCl<sub>3</sub>):  $\delta$  5.38 (brd,  $J$  = 4.0 Hz, 1H, 1 × olefinic), 4.65 (m, 1H, 1 × CHOCO), 3.42 (t,  $J$  = 8.0 Hz, 2H, 1 × CH<sub>2</sub>Br), 2.32 (m, 4H, 2 × allylic CH<sub>2</sub>), 2.03-1.04 (m, 32H, 13 × CH<sub>2</sub>, 6 × CH), 1.02 (s, 3H, 1 × CH<sub>3</sub>), 0.92 (d,  $J$  = 4.0 Hz, 3H, 1 × CH<sub>3</sub>), 0.87 (d,  $J$  = 1.6 Hz, 3H, 1 × CH<sub>3</sub>), 0.86 (d,  $J$  = 1.6 Hz, 3H, 1 × CH<sub>3</sub>), 0.68 (s, 3H, 1 × CH<sub>3</sub>); MS (FAB+): m/z calcd for C<sub>33</sub>H<sub>56</sub>BrO<sub>2</sub> : 563.3. Found: 563.4.

### 1d: Cholesteryl 8-bromooctanoate

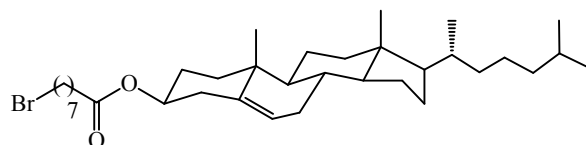

$R_f$  = 0.33 in 30%  $\text{CH}_2\text{Cl}_2$ -hexanes; a white solid; yield: 6.73g, 88 %; m.p.: 86.31 °C; IR (KBr Pellet):  $\nu_{\text{max}}$  in  $\text{cm}^{-1}$  2947, 2866, 1733, 1465, 1171, 1026;  $^1\text{H}$  NMR (400 MHz,  $\text{CDCl}_3$ ):  $\delta$  5.38 (brd,  $J$  = 3.4 Hz, 1H, 1  $\times$  olefinic), 4.63 (m, 1H, 1  $\times$  CHOCO), 3.42 (t,  $J$  = 8.0 Hz, 2H, 1  $\times$   $\text{CH}_2\text{Br}$ ), 2.32 (m, 4H, 2  $\times$  allylic  $\text{CH}_2$ ), 2.02-1.04 (m, 36H, 15  $\times$   $\text{CH}_2$ , 6  $\times$  CH), 1.02 (s, 3H, 1  $\times$   $\text{CH}_3$ ), 0.92 (d,  $J$  = 4.0 Hz, 3H, 1  $\times$   $\text{CH}_3$ ), 0.87 (d,  $J$  = 1.6 Hz, 3H, 1  $\times$   $\text{CH}_3$ ), 0.86 (d,  $J$  = 1.6 Hz, 3H, 1  $\times$   $\text{CH}_3$ ), 0.68 (s, 3H, 1  $\times$   $\text{CH}_3$ ); MS (FAB+):  $m/z$  calcd for  $\text{C}_{35}\text{H}_{59}\text{BrO}_2$ : 590.37. Found: 590.11.

### Ic. General procedure for the synthesis of cholesteryl $\omega$ -(4-nitrophenoxy)alkanoates (2a-d)

To a solution of cholesteryl  $\omega$ -bromoalkanoate (**1a** / **1b** / **1c** / **1d**) (1g, 1.9 mmol, 1 equiv.) in butanone was added 4-nitrophenol (2.1 mmol, 1 equiv) and anhyd.  $\text{K}_2\text{CO}_3$  (2.1 mmol, 1.1 equiv). The reaction mixture was refluxed at 80 °C for 12h. The reaction mixture was poured into ice cold water and extracted with  $\text{CH}_2\text{Cl}_2$ . The organic layer was washed with 5 % (aq) NaOH solution (25ml  $\times$  3), water (25ml  $\times$  3), brine and dried over anhyd,  $\text{Na}_2\text{SO}_4$ . The organic layer was concentrated and the crude obtained was purified by column chromatography using silica gel (100-200 mesh). Elution with 10% ethylacetate-hexanes furnished the pure product.

### 2a: Cholesteryl 4-(4-nitrophenoxy)butanoate

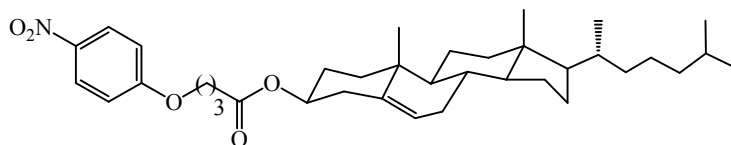

$R_f$  = 0.43 in 30%  $\text{CH}_2\text{Cl}_2$ -hexanes; white solid; yield: 0.9 g, 82% IR (Neat):  $\nu_{\text{max}}$  in  $\text{cm}^{-1}$  2946, 2867, 1733, 1592, 1510, 1378, 1338, 1178, 1111;  $^1\text{H}$  NMR (400MHz,  $\text{CDCl}_3$ ) :  $\delta$  8.20 (d, 2H,  $J$  = 6.8 Hz, Ar), 6.96 (d,  $J$  = 7.2 Hz, 2H, Ar), 5.38 (brd,  $J$  = 3.6 Hz, 1H, 1  $\times$  olefinic), 4.68-4.60 (m, 1H, 1  $\times$  CHOCO), 4.13 (t, 2H,  $J$  = 6.4 Hz, 1  $\times$   $\text{OCH}_2$ ), 2.52-2.30 (m, 4H, 2  $\times$

allylic CH<sub>2</sub>); 2.16 – 0.68 (m, 43H, 6 × CH, 11 × CH<sub>2</sub>, 5 × CH<sub>3</sub>); Anal. calcd for C<sub>37</sub>H<sub>55</sub>NO<sub>5</sub>: C, 74.83; H, 9.34; N, 2.36; Found: C, 74.25; H, 8.97; N, 2.72.

**2b:** Cholesteryl 5-(4-nitrophenoxy)pentanoate

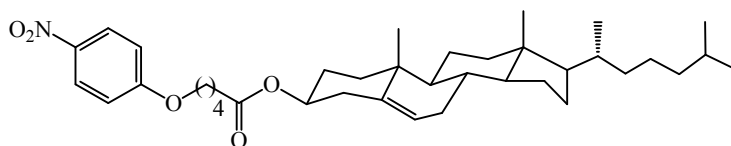

$R_f = 0.44$  in 30% CH<sub>2</sub>Cl<sub>2</sub>-hexanes; white solid; yield: 0.9 g, 84%; IR (Neat):  $\nu_{\max}$  in cm<sup>-1</sup> 2946, 2867, 1733, 1592, 1510, 1386, 1338, 1178, 1111; <sup>1</sup>H NMR (400MHz, CDCl<sub>3</sub>):  $\delta$  8.20 (d, 2H,  $J = 6.8$  Hz, Ar), 6.95 (d,  $J = 7.2$  Hz, 2H, Ar), 5.37 (brd,  $J = 3.6$  Hz, 1H, 1 × olefinic), 4.66-4.58 (m, 1H, 1 × CHOCO), 4.09 (t, 2H,  $J = 6.0$  Hz, 1 × OCH<sub>2</sub>), 2.39-2.30 (m, 4H, 2 × allylic CH<sub>2</sub>), 2.03 – 0.68 (m, 45H, 6 × CH, 12 × CH<sub>2</sub>, 5 × CH<sub>3</sub>); Anal. calcd for C<sub>38</sub>H<sub>57</sub>NO<sub>5</sub>: C, 75.08; H, 9.45; N, 2.3; Found: C, 75.27; H, 9.547; N, 3.07.

**2c:** Cholesteryl 6-(4-nitrophenoxy)hexanoate

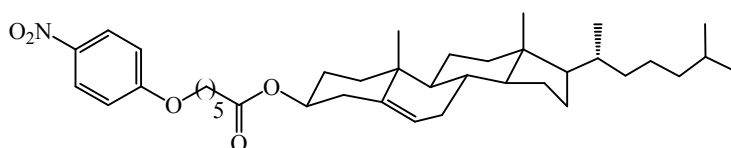

$R_f = 0.44$  in 30% CH<sub>2</sub>Cl<sub>2</sub>-hexanes; white solid; yield: 0.9g, 80%; IR (Neat):  $\nu_{\max}$  in cm<sup>-1</sup> 2946, 2867, 1732, 1592, 1511, 1386, 1338, 1178, 1111; <sup>1</sup>H NMR (400MHz, CDCl<sub>3</sub>):  $\delta$  8.20 (d, 2H,  $J = 7.2$  Hz, Ar), 6.94 (d,  $J = 6.8$  Hz, 2H, Ar), 5.37 (brd,  $J = 4.0$  Hz, 1H, 1 × olefinic), 4.66-4.58 (m, 1H, 1 × CHOCO), 4.07 (t, 2H,  $J = 6.4$  Hz, 1 × OCH<sub>2</sub>), 2.34-2.30 (m, 4H, 2 × allylic CH<sub>2</sub>), 2.00 – 0.68 (m, 47H, 6 × CH, 13 × CH<sub>2</sub>, 5 × CH<sub>3</sub>); Anal. calcd for C<sub>39</sub>H<sub>59</sub>NO<sub>5</sub>: C, 75.32; H, 9.56; N, 2.25; Found: C, 76.06; H, 9.29; N, 3.09.

**2d:** Cholesteryl 8-(4-nitrophenoxy)octanoate.

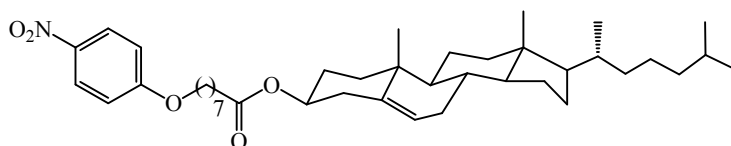

$R_f = 0.45$  in 30% CH<sub>2</sub>Cl<sub>2</sub>-hexanes; white solid; yield: 0.8g, 76%; IR (Neat):  $\nu_{\max}$  in cm<sup>-1</sup> 2944, 2868, 1732, 1593, 1510, 1337, 1180, 1110; <sup>1</sup>H NMR (400MHz, CDCl<sub>3</sub>):  $\delta$  8.20 (d, 2H,  $J = 7.2$  Hz, Ar), 6.95 (d,  $J = 7.2$  Hz, 2H, Ar), 5.37 (brd,  $J = 4.0$  Hz, 1H, 1 × olefinic), 4.65-

4.57 (m, 1H, 1 × CHOCO), 4.06 (t, 2H,  $J = 6.4$  Hz, 1 × OCH<sub>2</sub>), 2.32-2.26 (m, 4H, 2 × allylic CH<sub>2</sub>), 1.99 – 0.68 (m, 51H, 6 × CH, 15 × CH<sub>2</sub>, 5 × CH<sub>3</sub>); Anal. calcd for C<sub>41</sub>H<sub>63</sub>NO<sub>5</sub>: C, 75.77; H, 9.77; N, 2.16; Found: C, 75.15; H, 9.72; N, 2.58.

**Id.** General procedures for the synthesis of cholesteryl ω-(4-aminophenoxy)alkanoates (**3a-d**)

Nitro compound (**2a** / **2b** / **2c** / **2d**) (0.5g) was taken in THF solution. To this was added 10% Pd-C (10% weight of the starting material). The reaction mixture was degassed and stirred under H<sub>2</sub> gas (1 atmospheric pressure, balloon) for 4h at rt. The reaction mixture was filtered over celite bed, concentrated and the solid obtained was recrystallized from hexanes to afford a off-white solid.

**3a:** Cholesteryl 4-(4-aminophenoxy)butanoate

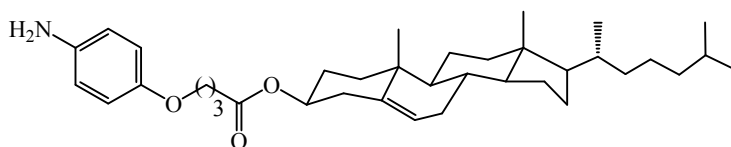

$R_f = 0.49$  in 50% CH<sub>2</sub>Cl<sub>2</sub>-hexanes; white solid; yield: 0.42g, 87%; IR (Neat):  $\nu_{\max}$  in cm<sup>-1</sup> 3376, 2937, 2868, 1726, 1179, 1103; <sup>1</sup>H NMR (400MHz, CDCl<sub>3</sub>) :  $\delta$  6.73 (d, 2H,  $J = 6.8$  Hz, Ar), 6.64 (d,  $J = 6.8$  Hz, 2H, Ar), 5.37 (brd,  $J = 3.6$  Hz, 1H, 1 × olefinic), 4.63-4.60 (m, 1H, 1 × CHOCO), 3.91 (t, 2H,  $J = 6.0$  Hz, 1 × OCH<sub>2</sub>), 3.42 (brs, 2H, 1 × NH<sub>2</sub>), 2.35-2.30 (m, 4H, 2 × allylic CH<sub>2</sub>), 1.99 – 0.68 (m, 43H, 6 × CH, 11 × CH<sub>2</sub>, 5 × CH<sub>3</sub>); Anal. calcd for C<sub>37</sub>H<sub>57</sub>NO<sub>3</sub>: C, 78.81; H, 10.19; N, 2.48; Found: C, 78.31; H, 10.25; N, 2.72.

**3b:** Cholesteryl 5-(4-aminophenoxy)pentanoate

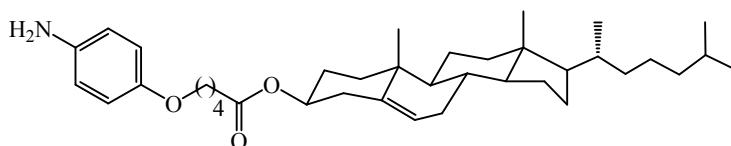

$R_f = 0.49$  in 50% CH<sub>2</sub>Cl<sub>2</sub>-hexanes; white solid; yield: 0.44g, 92 %; IR (Neat):  $\nu_{\max}$  in cm<sup>-1</sup> 3376, 2938, 2869, 1726, 1179, 1103; <sup>1</sup>H NMR (400MHz, CDCl<sub>3</sub>) :  $\delta$  6.74 (d, 2H,  $J = 6.4$  Hz, Ar), 6.65 (d,  $J = 6.8$  Hz, 2H, Ar), 5.37 (brd,  $J = 3.6$  Hz, 1H, 1 × olefinic), 4.66-4.57 (m, 1H, 1 × CHOCO), 3.89 (t, 2H,  $J = 6.4$  Hz, 1 × OCH<sub>2</sub>), 2.32-2.28 (m, 4H, 2 × allylic CH<sub>2</sub>), 1.99 – 0.68 (m, 45H, 6 × CH, 12 × CH<sub>2</sub>, 5 × CH<sub>3</sub>); Anal. calcd for C<sub>38</sub>H<sub>59</sub>NO<sub>3</sub>: C, 78.98; H, 10.29; N, 2.42; Found: C, 79.30; H, 10.82; N, 2.36.

**3c:** Cholesteryl 6-(4-aminophenoxy)hexanoate.

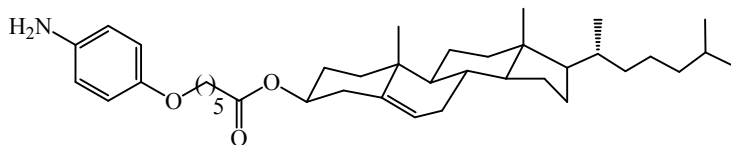

$R_f = 0.50$  in 50%  $\text{CH}_2\text{Cl}_2$ -hexanes; white solid; yield: 0.43g, 90 %; IR (Neat):  $\nu_{\text{max}}$  in  $\text{cm}^{-1}$  3374, 2940, 2869, 1726, 1179, 1102;  $^1\text{H NMR}$  (400MHz,  $\text{CDCl}_3$ ) :  $\delta$  6.66 (d, 2H,  $J = 6.4$  Hz, Ar), 6.57 (d,  $J = 6.4$  Hz, 2H, Ar), 5.30 (brd,  $J = 4.0$  Hz, 1H, 1  $\times$  olefinic), 4.58 -4.52 (m, 1H, 1  $\times$  CHOCO), 3.85 (t, 2H,  $J = 6.4$  Hz, 1  $\times$   $\text{OCH}_2$ ), 2.28 - 2.23 (m, 4H, 2  $\times$  allylic  $\text{CH}_2$ ), 1.92 – 0.61 (m, 47H, 6  $\times$  CH, 13  $\times$   $\text{CH}_2$ , 5  $\times$   $\text{CH}_3$ ); Anal. calcd for  $\text{C}_{39}\text{H}_{61}\text{NO}_3$ : C, 79.14; H, 10.39; N, 2.37; Found: C, 79.41; H, 10.63; N, 2.38.

**3d:** Cholesteryl 8-(4-aminophenoxy)octanoate.

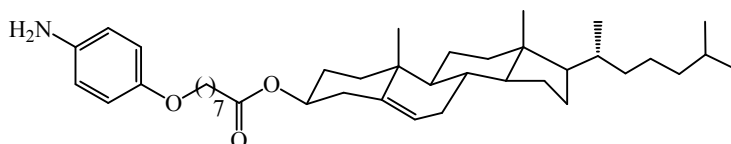

$R_f = 0.51$  in 50%  $\text{CH}_2\text{Cl}_2$ -hexanes; white solid; yield: 0.45g, 94 %; IR (Neat):  $\nu_{\text{max}}$  in  $\text{cm}^{-1}$  3374, 2940, 2869, 1726, 1179, 1102;  $^1\text{H NMR}$  (400MHz,  $\text{CDCl}_3$ ) :  $\delta$  6.75 (d, 2H,  $J = 6.8$  Hz, Ar), 6.67 (d,  $J = 6.4$  Hz, 2H, Ar), 5.38 (brd,  $J = 3.6$  Hz, 1H, 1  $\times$  olefinic), 4.65-4.57 (m, 1H, 1  $\times$  CHOCO), 3.90 (t, 2H,  $J = 6.4$  Hz, 1  $\times$   $\text{OCH}_2$ ), 2.32-2.25 (m, 4H, 2  $\times$  allylic  $\text{CH}_2$ ), 1.99 – 0.68 (m, 51H, 6  $\times$  CH, 15  $\times$   $\text{CH}_2$ , 5  $\times$   $\text{CH}_3$ ); Anal. calcd for  $\text{C}_{41}\text{H}_{65}\text{NO}_3$ : C, 79.43; H, 10.57; N, 2.26; Found: C, 79.71; H, 10.44; N, 2.59.

**Ie.** General procedure for the synthesis of 4-(*n*-alkoxy)benzaldehydes (**4a-e**)

To a solution of 4-hydroxybenzaldehyde (1g, 8.19mmol, 1 equiv.) in butanone was added *n*-alkoxybromide (9.01 mmol, 1.1 equiv) and anhyd.  $\text{K}_2\text{CO}_3$  (9.01 mmol, 1.1 equiv). The reaction mixture was refluxed at 80 °C for 12h. The reaction mixture was poured into ice cold water and extracted with  $\text{CH}_2\text{Cl}_2$ . The organic layer was washed with 5 % (aq) NaOH solution (25ml  $\times$  3), water (25ml  $\times$  3), brine and dried over anhyd,  $\text{Na}_2\text{SO}_4$ . The organic layer was concentrated and the crude obtained was purified by column chromatography using silica gel (100-200 mesh). Elution with 10% ethylacetate-hexanes furnished the pure product.

**4a:** 4-(*n*-Butyloxy)benzaldehyde.

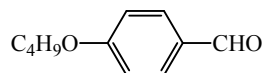

$R_f = 0.51$  in 30%  $\text{CH}_2\text{Cl}_2$ -hexanes; pale yellow liquid; yield: 1.1g, 75%; IR (Neat):  $\nu_{\text{max}}$  in  $\text{cm}^{-1}$  2959, 2874, 1695, 1383, 1230, 1128, 1112;  $^1\text{H NMR}$  (400MHz,  $\text{CDCl}_3$ ):  $\delta$  9.88 (s, 1H, 1  $\times$  CHO), 7.84 (d,  $J = 6.8$  Hz, 2H, Ar), 7.00 (d,  $J = 6.8$  Hz, 2H, Ar), 4.07 (t,  $J = 6.4$  Hz, 2H, 1  $\times$   $\text{OCH}_2$ ), 1.84-1.46 (m, 4H, 2  $\times$   $\text{CH}_2$ ), 0.99 (t,  $J = 7.6$  Hz, 3H, 1  $\times$   $\text{CH}_3$ ); MS(FAB<sup>+</sup>): m/z Calcd. for  $\text{C}_{11}\text{H}_{14}\text{O}_2$ : 178.1; Found: 178.3.

**4b:** 4-(*n*-Hexyloxy)benzaldehyde

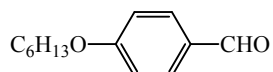

$R_f = 0.51$  in 30%  $\text{CH}_2\text{Cl}_2$ -hexanes; pale yellow liquid; yield: 1.3g, 79%; IR (Neat):  $\nu_{\text{max}}$  in  $\text{cm}^{-1}$  2959, 2873, 1696, 1230 and 1112;  $^1\text{H NMR}$  (400MHz,  $\text{CDCl}_3$ ):  $\delta$  9.88 (s, 1H, 1  $\times$  CHO), 7.84 (d,  $J = 6.8$  Hz, 2H, Ar), 7.00 (d,  $J = 6.8$  Hz, 2H, Ar), 4.06 (t,  $J = 6.8$  Hz, 2H, 1  $\times$   $\text{OCH}_2$ ), 1.85-1.29 (m, 8H, 4  $\times$   $\text{CH}_2$ ), 0.91 (t,  $J = 6.8$  Hz, 3H, 1  $\times$   $\text{CH}_3$ ); MS(FAB<sup>+</sup>): m/z Calcd. for  $\text{C}_{13}\text{H}_{19}\text{O}_2(\text{M}+1)$ : 207.1; Found: 207.2.

**4c:** 4-(*n*-Octyloxy)benzaldehyde

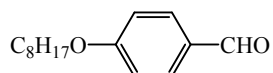

$R_f = 0.51$  in 30%  $\text{CH}_2\text{Cl}_2$ -hexanes; pale yellow liquid; yield: 1.5g, 77%; IR (Neat):  $\nu_{\text{max}}$  in  $\text{cm}^{-1}$  2959, 2873, 1695, 1231, 1128, 1113;  $^1\text{H NMR}$  (400MHz,  $\text{CDCl}_3$ ):  $\delta$  9.88 (s, 1H, 1  $\times$  CHO), 7.84 (d,  $J = 6.8$  Hz, 2H, Ar), 7.01 (d,  $J = 6.8$  Hz, 2H, Ar), 4.05 (t,  $J = 6.8$  Hz, 2H, 1  $\times$   $\text{OCH}_2$ ), 1.85-1.28 (m, 12H, 6  $\times$   $\text{CH}_2$ ), 0.90 (t,  $J = 6.8$  Hz, 3H, 1  $\times$   $\text{CH}_3$ ); MS(FAB<sup>+</sup>): m/z Calcd. for  $\text{C}_{15}\text{H}_{23}\text{O}_2(\text{M}+1)$ : 235.2; Found: 235.2.

**4d:** 4-(*n*-Decyloxy)benzaldehyde.

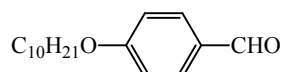

$R_f = 0.52$  in 30%  $\text{CH}_2\text{Cl}_2$ -hexanes; pale yellow liquid; yield: 1.6g, 75%; IR (Neat):  $\nu_{\text{max}}$  in  $\text{cm}^{-1}$  2926, 2855, 1670, 1215, 1160, 1109;  $^1\text{H NMR}$  (400MHz,  $\text{CDCl}_3$ ):  $\delta$  9.88 (s, 1H, 1  $\times$  CHO), 7.84 (d,  $J = 8.8$  Hz, 2H, Ar), 7.01 (d,  $J = 6.8$  Hz, 2H, Ar), 4.05 (t,  $J = 6.4$  Hz, 2H, 1  $\times$



OCH<sub>2</sub>), 1.83-1.30 (m, 16H, 8 × CH<sub>2</sub>), 0.90 (t, *J* = 6.8 Hz, 3H, 1 × CH<sub>3</sub>); MS(FAB<sup>+</sup>): *m/z* Calcd. for C<sub>17</sub>H<sub>26</sub>O<sub>2</sub>: 262.2; Found: 262.5.

**4e:** 4-(*n*-Dodecyloxy)benzaldehyde.

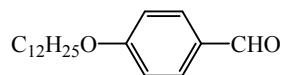

*R<sub>f</sub>* = 0.52 in 30% CH<sub>2</sub>Cl<sub>2</sub>-hexanes; pale yellow liquid; yield: 1.8g, 74%; IR (Neat):  $\nu_{\max}$  in cm<sup>-1</sup> 2927, 2855, 1694, 1230, 1160 and 1110; <sup>1</sup>H NMR (400MHz, CDCl<sub>3</sub>):  $\delta$  9.88 (s, 1H, 1 × CHO), 7.83 (d, *J* = 6.8 Hz, 2H, Ar), 7.00 (d, *J* = 6.8 Hz, 2H, Ar), 4.06 (t, *J* = 6.6 Hz, 2H, 1 × OCH<sub>2</sub>), 1.83-1.33 (m, 20H, 10 × CH<sub>2</sub>), 0.90 (t, *J* = 7.1 Hz, 3H, 1 × CH<sub>3</sub>); MS(FAB<sup>+</sup>): *m/z* Calcd. for C<sub>19</sub>H<sub>30</sub>O<sub>2</sub>: 290.2; Found: 290.6.

**If:** General procedures for the synthesis of cholesteryl 4-(4-((4-*n*-alkoxybenzylidene)-amino)phenoxy)alkanoates (**DSB-n,R**)

A mixture of cholesteryl  $\omega$ -(4-aminophenoxy)alkanoate (**3a** / **3b** / **3c** / **3d**) (0.126 mmol, 1 equiv), 4-*n*-alkoxyl benzaldehydes (0.63 mmol, 1.5 equiv) and catalytic amount of glacial acetic acid (2 drops) in absolute ethanol was refluxed for 1h. The dull yellow solid material obtained on cooling was filtered, washed continually with hot ethanol and further purified by repeated recrystallization from a mixture of CH<sub>2</sub>Cl<sub>2</sub>:EtOH (1:9) to obtain off-white pure solids.

**DSB-3,4:** Cholesteryl 4-(4-((4-butoxybenzylidene)amino)phenoxy)butanoate

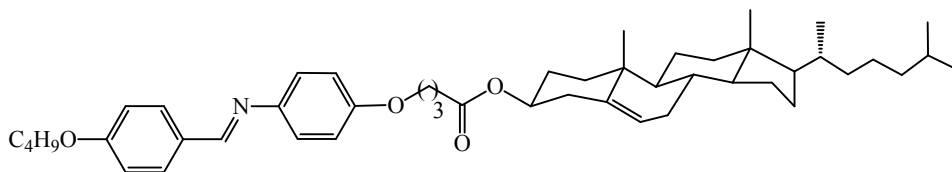

Yield: 0.063g, 82%; IR (Neat):  $\nu_{\max}$  in cm<sup>-1</sup> 2955, 2869, 1732, 1608, 1179, 1112; UV-Vis:  $\lambda_{\max}$  = 335 nm,  $\epsilon$  = 1.56 × 10<sup>3</sup> L mol<sup>-1</sup> cm<sup>-1</sup>; <sup>1</sup>H NMR (400MHz, CDCl<sub>3</sub>):  $\delta$  8.39 (s, 1H, 1 × CH=N), 7.83 (d, *J* = 8.8 Hz, 2H, Ar), 7.20 (d, *J* = 9.2 Hz, 2H, Ar), 6.98 (d, *J* = 8.8 Hz, 2H, Ar), 6.92 (d, *J* = 8.8 Hz, 2H, Ar), 5.39 (brd, *J* = 4.0 Hz, 1H, olefinic), 4.68 (m, 1H, 1 × CHOCO), 4.05 (m, 4H, 2 × OCH<sub>2</sub>), 2.53-2.12 (m, 4H, 2 × allylic CH<sub>2</sub>), 1.99-0.68 (m, 50H, 6 × CH, 13 × CH<sub>2</sub>, 6 × CH<sub>3</sub>); <sup>13</sup>C NMR (100MHz): 172.6, 161.6, 157.9, 157.2, 145.4, 139.7, 130.2, 129.3, 122.7, 122.0, 115.0, 114.7, 74.1, 67.9, 67.1, 56.7, 56.2, 50.1, 42.3, 39.8, 39.5, 38.2, 37.0, 36.6, 36.2, 35.8, 31.9, 31.2, 29.0, 28.2, 28.0, 27.8, 24.8, 24.3, 23.8, 22.8, 22.6,

21.0, 19.3, 19.2, 18.7, 13.8, 11.9; Anal. calcd for C<sub>48</sub>H<sub>69</sub>NO<sub>4</sub>: C, 79.62; H, 9.61; N, 1.93; Found: C, 80.11; H, 9.65; N, 2.50.

**DSB-3,6:** Cholesteryl 4-(4-((4-hexyloxybenzylidene)amino)phenoxy)butanoate

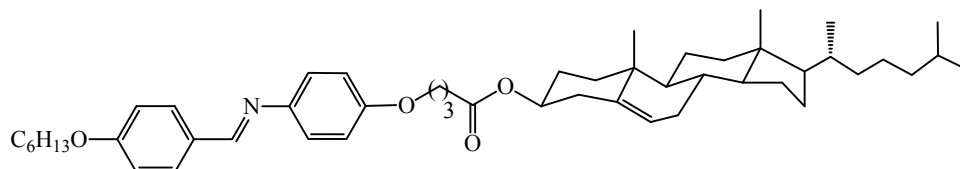

Yield: 0.067g, 84%; IR (Neat):  $\nu_{\max}$  in  $\text{cm}^{-1}$  2954, 2869, 1732, 1608, 1178, 1112; UV-Vis:  $\lambda_{\max} = 334 \text{ nm}$ ,  $\epsilon = 2.28 \times 10^3 \text{ L mol}^{-1} \text{ cm}^{-1}$ ; <sup>1</sup>H NMR (400MHz, CDCl<sub>3</sub>):  $\delta$  8.39 (s, 1H, 1  $\times$  CH=N), 7.82 (d,  $J = 7.2 \text{ Hz}$ , 2H, Ar), 7.19 (d,  $J = 6.8 \text{ Hz}$ , 2H, Ar), 6.99 (d,  $J = 7.2 \text{ Hz}$ , 2H, Ar), 6.91 (d,  $J = 6.4 \text{ Hz}$ , 2H, Ar), 5.38 (brd,  $J = 4.8 \text{ Hz}$ , 1H, olefinic), 4.68 (m, 1H, 1  $\times$  CHOCO), 4.03 (m, 4H, 2  $\times$  OCH<sub>2</sub>), 2.52-2.31 (m, 4H, 2  $\times$  allylic CH<sub>2</sub>), 2.12-0.68 (m, 54H, 6  $\times$  CH, 15  $\times$  CH<sub>2</sub>, 6  $\times$  CH<sub>3</sub>); <sup>13</sup>C NMR (100MHz): 172.6, 161.6, 158.0, 157.2, 145.4, 139.7, 130.2, 129.3, 122.7, 122.0, 115.0, 114.7, 74.1, 68.2, 67.1, 56.7, 56.2, 50.1, 42.3, 39.8, 39.5, 38.2, 37.0, 36.6, 36.2, 35.8, 31.9, 31.6, 31.2, 29.2, 28.2, 28.0, 27.8, 25.7, 24.8, 24.3, 23.8, 1.86; 22.8, 22.6, 22.5, 21.0, 19.3, 18.7, 14.0, 11.9; Anal. calcd for C<sub>50</sub>H<sub>73</sub>NO<sub>4</sub>: C, 79.85; H, 9.78; N, 1.86; Found : C, 80.46; H, 9.90; N, 2.31.

**DSB-3,8:** Cholesteryl 4-(4-((4-octyloxybenzylidene)amino)phenoxy)butanoate

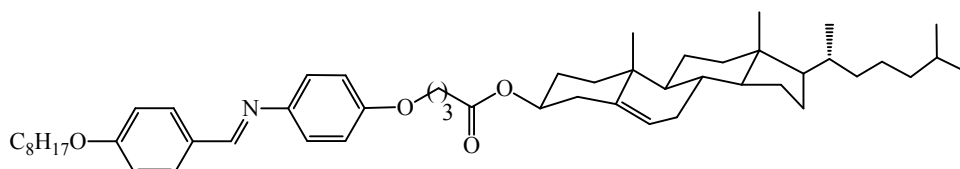

Yield: 0.070g, 85%; IR (Neat):  $\nu_{\max}$  in  $\text{cm}^{-1}$  2952, 2870, 1732, 1608, 1178, 1111; UV-Vis:  $\lambda_{\max} = 335 \text{ nm}$ ,  $\epsilon = 2.13 \times 10^3 \text{ L mol}^{-1} \text{ cm}^{-1}$ ; <sup>1</sup>H NMR (400MHz, CDCl<sub>3</sub>):  $\delta$  8.39 (s, 1H, 1  $\times$  CH=N), 7.82 (d,  $J = 8.8 \text{ Hz}$ , 2H, Ar), 7.19 (d,  $J = 6.8 \text{ Hz}$ , 2H, Ar), 6.97 (d,  $J = 8.8 \text{ Hz}$ , 2H, Ar), 6.91 (d,  $J = 6.8 \text{ Hz}$ , 2H, Ar), 5.38 (brd,  $J = 4.0 \text{ Hz}$ , 1H, olefinic), 4.68 (m, 1H, 1  $\times$  CHOCO), 4.04 (m, 4H, 2  $\times$  OCH<sub>2</sub>), 2.52-2.31 (m, 4H, 2  $\times$  allylic CH<sub>2</sub>), 2.12-0.68 (m, 58H, 6  $\times$  CH, 17  $\times$  CH<sub>2</sub>, 6  $\times$  CH<sub>3</sub>); <sup>13</sup>C NMR (100MHz): 172.1, 161.2, 157.5, 156.7, 145.0, 139.2, 129.7, 128.8, 122.2, 121.6, 114.5, 114.2, 73.6, 67.7, 66.6, 56.2, 55.7, 49.6, 41.9, 39.3, 39.1, 37.7, 36.5, 36.1, 35.7, 35.3, 31.4, 31.3, 30.7, 28.9, 28.8, 28.7, 27.8, 27.5, 27.3, 25.6, 24.3, 23.8, 23.4, 22.3, 22.2, 22.1, 20.6, 18.8, 18.2, 13.6, 11.4; Anal. calcd for C<sub>52</sub>H<sub>77</sub>NO<sub>4</sub>: C, 80.05; H, 9.95; N, 1.80; Found: C, 80.33; H, 10.30; N, 1.73.

**DSB-3,10:** Cholesteryl 4-(4-((4-decyloxy)benzylidene)amino)phenoxy)butanoate

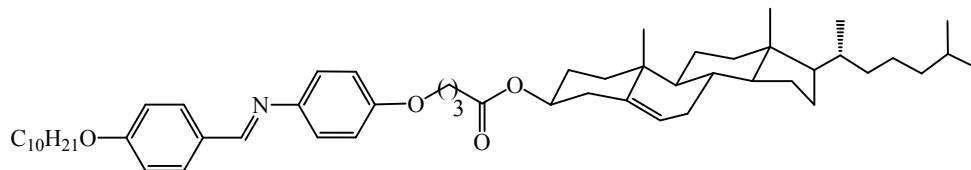

Yield: 0.068g, 80%; IR (Neat):  $\nu_{\max}$  in  $\text{cm}^{-1}$  2955, 2869, 1732, 1608, 1178, 1112; UV-Vis:  $\lambda_{\max} = 335 \text{ nm}$ ,  $\epsilon = 7.99 \times 10^3 \text{ L mol}^{-1} \text{ cm}^{-1}$ ;  $^1\text{H NMR}$  (400MHz,  $\text{CDCl}_3$ ) :  $\delta$  8.39 (s, 1H, 1  $\times$  CH=N), 7.82 (d,  $J = 8.8 \text{ Hz}$ , 2H, Ar), 7.19 (d,  $J = 8.8 \text{ Hz}$ , 2H, Ar), 6.97 (d,  $J = 8.4 \text{ Hz}$ , 2H, Ar), 6.91 (d,  $J = 8.8 \text{ Hz}$ , 2H, Ar), 5.38 (brd,  $J = 4.0 \text{ Hz}$ , 1H, olefinic), 4.65 (m, 1H, 1  $\times$  CHOCO), 4.04 (m, 4H, 2  $\times$  OCH<sub>2</sub>), 2.52-2.31 (m, 4H, 2  $\times$  allylic CH<sub>2</sub>), 2.14-0.68 (m, 62H, 6  $\times$  CH, 19  $\times$  CH<sub>2</sub>, 6  $\times$  CH<sub>3</sub>);  $^{13}\text{C NMR}$  (100MHz): 172.9, 161.6, 157.9, 157.3, 145.3, 139.7, 130.2, 129.3, 122.6, 122.0, 115.0, 114.7, 73.9, 67.9, 67.8, 56.7, 56.2, 50.0, 42.3, 39.7, 39.5, 38.2, 37.0, 36.6, 36.2, 35.8, 34.3, 31.9, 31.2, 28.7, 28.2, 28.0, 27.8, 24.3, 23.8, 22.8, 22.6, 21.8, 21.0, 19.3, 19.2, 18.7, 14.0, 11.9; Anal. calcd for  $\text{C}_{54}\text{H}_{81}\text{NO}_4$ : C, 80.25; H, 10.10; N, 1.73; Found: C, 79.85; H, 10.43; N, 1.58.

**DSB-3,12:** Cholesteryl 4-(4-((4-dodecyloxy)benzylidene)amino)phenoxy)butanoate.

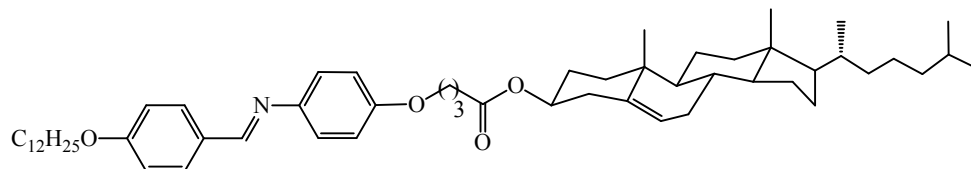

Yield: 0.066g, 83%; IR (Neat):  $\nu_{\max}$  in  $\text{cm}^{-1}$  2935, 2852, 1736, 1606, 1171, 1108; UV-Vis:  $\lambda_{\max} = 334 \text{ nm}$ ,  $\epsilon = 7.67 \times 10^3 \text{ L mol}^{-1} \text{ cm}^{-1}$ ;  $^1\text{H NMR}$  (400MHz,  $\text{CDCl}_3$ ) :  $\delta$  8.39 (s, 1H, 1  $\times$  CH=N), 7.82 (d,  $J = 8.8 \text{ Hz}$ , 2H, Ar), 7.19 (d,  $J = 8.8 \text{ Hz}$ , 2H, Ar), 6.97 (d,  $J = 8.8 \text{ Hz}$ , 2H, Ar), 6.91 (d,  $J = 8.8 \text{ Hz}$ , 2H, Ar), 5.37 (brd,  $J = 4.4 \text{ Hz}$ , 1H, olefinic), 4.66 (m, 1H, 1  $\times$  CHOCO), 4.08 (m, 4H, 2  $\times$  OCH<sub>2</sub>), 2.39-2.30 (m, 4H, 2  $\times$  allylic CH<sub>2</sub>), 2.0-0.68 (m, 66H, 6  $\times$  CH, 21  $\times$  CH<sub>2</sub>, 6  $\times$  CH<sub>3</sub>);  $^{13}\text{C NMR}$  (100MHz): 172.9, 161.6, 157.9, 145.3, 139.7, 130.2, 129.3, 122.6, 122.0, 115.0, 114.7, 73.9, 68.2, 67.7, 56.7, 56.2, 50.0, 42.3, 39.7, 39.5, 38.2, 37.0, 36.6, 36.2, 35.8, 34.3, 31.9, 31.8, 31.6, 29.2, 28.7, 28.2, 28.0, 27.8, 25.7, 24.3, 23.8, 22.8, 22.6, 21.7, 21.0, 19.3, 18.7, 14.0 and 11.9; Anal. calcd for  $\text{C}_{56}\text{H}_{85}\text{NO}_4$ : C, 80.43; H, 10.24; N, 1.67; Found: C, 80.26; H, 10.29; N, 1.83.

**DSB-4,4:** Cholesteryl 5-(4-((4-butoxy)benzylidene)amino)phenoxy)pentanoate

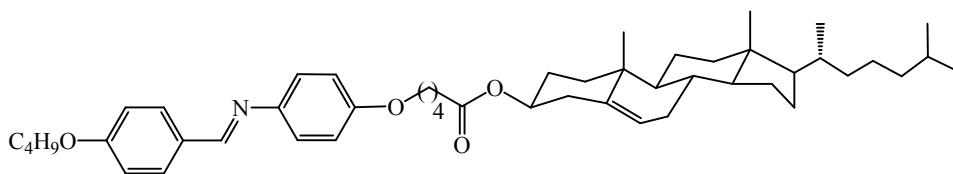

Yield: 0.064g, 72%; IR (Neat):  $\nu_{\max}$  in  $\text{cm}^{-1}$  2935, 2852, 1736, 1606, 1171, 1108; UV-Vis:  $\lambda_{\max} = 335 \text{ nm}$ ,  $\epsilon = 1.07 \times 10^3 \text{ L mol}^{-1} \text{ cm}^{-1}$ ;  $^1\text{H NMR}$  (400MHz,  $\text{CDCl}_3$ ):  $\delta$  8.39 (s, 1H,  $1 \times \text{CH}=\text{N}$ ), 7.82 (d,  $J = 8.8 \text{ Hz}$ , 2H, Ar), 7.19 (d,  $J = 6.8 \text{ Hz}$ , 2H, Ar), 6.97 (d,  $J = 8.8 \text{ Hz}$ , 2H, Ar), 6.91 (d,  $J = 6.8 \text{ Hz}$ , 2H, Ar), 5.38 (brd,  $J = 4.0 \text{ Hz}$ , 1H, olefinic), 4.63 (m, 1H,  $1 \times \text{CHOCO}$ ), 4.04 (m, 4H,  $2 \times \text{OCH}_2$ ), 2.37-2.30 (m, 4H,  $2 \times$  allylic  $\text{CH}_2$ ), 2.02-0.68 (m, 52H,  $6 \times \text{CH}$ ,  $14 \times \text{CH}_2$ ,  $6 \times \text{CH}_3$ );  $^{13}\text{C NMR}$  (100MHz): 172.4, 161.2, 157.4, 156.8, 144.8, 139.2, 129.7, 128.8, 122.2, 121.6, 114.5, 114.2, 73.4, 67.4, 67.2, 56.2, 55.7, 49.6, 41.9, 39.3, 39.1, 37.7, 36.5, 36.1, 35.7, 35.3, 33.8, 31.4, 30.8, 28.2, 27.8, 27.5, 27.3, 23.8, 23.4, 22.3, 22.1, 21.3, 20.6, 18.8, 18.2, 13.4, 11.4; Anal. calcd for  $\text{C}_{49}\text{H}_{71}\text{NO}_4$ : C, 79.74; H, 9.70; N, 1.90; Found: C, 79.98; H, 9.93; N, 2.35.

**DSB-4,6:** Cholesteryl 5-(4-((4-hexyloxybenzylidene)amino)phenoxy)pentanoate

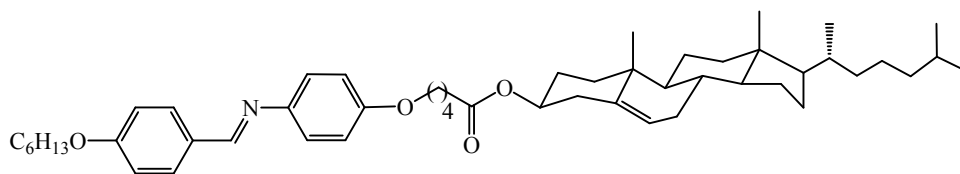

Yield: 0.069g, 75%; IR (Neat):  $\nu_{\max}$  in  $\text{cm}^{-1}$  2931, 2857, 1736, 1606, 1168, 1110; UV-Vis:  $\lambda_{\max} = 335 \text{ nm}$ ,  $\epsilon = 2.67 \times 10^3 \text{ L mol}^{-1} \text{ cm}^{-1}$ ;  $^1\text{H NMR}$  (400MHz,  $\text{CDCl}_3$ ):  $\delta$  8.39 (s, 1H,  $1 \times \text{CH}=\text{N}$ ), 7.82 (d,  $J = 8.4 \text{ Hz}$ , 2H, Ar), 7.19 (d,  $J = 8.8 \text{ Hz}$ , 2H, Ar), 6.97 (d,  $J = 8.4 \text{ Hz}$ , 2H, Ar), 6.91 (d,  $J = 8.8 \text{ Hz}$ , 2H, Ar), 5.37 (brd,  $J = 4.0 \text{ Hz}$ , 1H, olefinic), 4.66 (m, 1H,  $1 \times \text{CHOCO}$ ), 4.03 (m, 4H,  $2 \times \text{OCH}_2$ ), 2.37-2.30 (m, 4H,  $2 \times$  allylic  $\text{CH}_2$ ), 1.99-0.67 (m, 56H,  $6 \times \text{CH}$ ,  $16 \times \text{CH}_2$ ,  $6 \times \text{CH}_3$ );  $^{13}\text{C NMR}$  (100MHz): 172.9, 161.6, 157.9, 145.3, 139.7, 130.2, 129.3, 122.6, 122.0, 115.0, 114.7, 73.9, 68.2, 67.7, 56.7, 56.2, 50.0, 42.3, 39.7, 39.5, 38.2, 37.0, 36.6, 36.2, 35.8, 34.3, 31.9, 31.6, 29.2, 28.7, 28.2, 28.0, 27.8, 25.7, 24.3, 23.8, 22.8, 22.6, 21.7, 21.0, 19.3, 18.7, 14.0, 11.8; Anal. calcd for  $\text{C}_{51}\text{H}_{75}\text{NO}_4$ : C, 79.95; H, 9.87; N, 1.83; Found: C, 80.45; H, 9.50; N, 2.09.

**DSB-4,8:** Cholesteryl 5-(4-((4-octyloxybenzylidene)amino)phenoxy)pentanoate

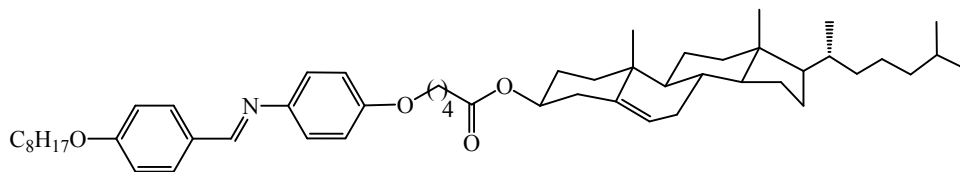

Yield: 0.074g, 77%; IR (Neat):  $\nu_{\max}$  in  $\text{cm}^{-1}$  2935, 2852, 1736, 1606, 1171, 1108; UV-Vis:  $\lambda_{\max} = 336 \text{ nm}$ ,  $\epsilon = 2.92 \times 10^3 \text{ L mol}^{-1} \text{ cm}^{-1}$ ;  $^1\text{H NMR}$  (400MHz,  $\text{CDCl}_3$ ):  $\delta$  8.39 (s, 1H,  $1 \times \text{CH}=\text{N}$ ), 7.82 (d,  $J = 8.8 \text{ Hz}$ , 2H, Ar), 7.19 (d,  $J = 8.4 \text{ Hz}$ , 2H, Ar), 6.97 (d,  $J = 8.8 \text{ Hz}$ , 2H, Ar), 6.91 (d,  $J = 8.8 \text{ Hz}$ , 2H, Ar), 5.37 (brd,  $J = 4.4\text{Hz}$ , 1H, olefinic), 4.63 (m, 1H,  $1 \times \text{CHOCO}$ ), 4.03 (m, 4H,  $2 \times \text{OCH}_2$ ), 2.39-2.30 (m, 4H,  $2 \times$  allylic  $\text{CH}_2$ ), 2.02-0.68 (m, 60H,  $6 \times \text{CH}$ ,  $18 \times \text{CH}_2$ ,  $6 \times \text{CH}_3$ );  $^{13}\text{C NMR}$  (100MHz): 172.8, 161.6, 157.9, 157.3, 145.3, 139.7, 130.2, 129.3, 122.6, 122.0, 115.0, 114.7, 73.9, 68.2, 67.7, 56.7, 56.2, 50.1, 42.3, 39.8, 39.5, 38.2, 37.0, 36.6, 36.2, 35.8, 34.3, 31.9, 31.8, 29.4, 29.2, 28.7, 28.2, 28.0, 27.8, 26.0, 24.3, 23.8, 22.6, 21.8, 21.0, 19.3, 18.7, 14.1, 11.9; Anal. calcd for  $\text{C}_{53}\text{H}_{79}\text{NO}_4$ : C, 80.15; H, 10.03; N, 1.76; Found: C, 80.48; H, 10.28; N, 1.87.

**DSB-4,10:** Cholesteryl 5-(4-((4-decyloxybenzylidene)amino)phenoxy)pentanoate

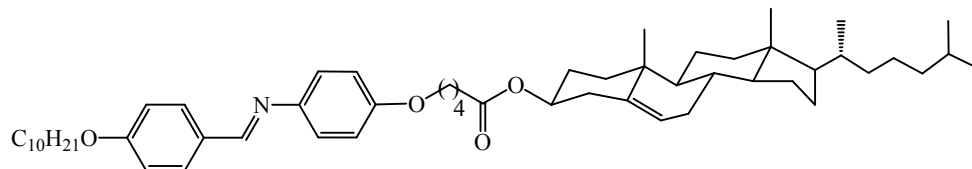

Yield: 0.066g, 66%; IR (Neat):  $\nu_{\max}$  in  $\text{cm}^{-1}$  2931, 2857, 1736, 1606, 1168, 1108; UV-Vis:  $\lambda_{\max} = 335 \text{ nm}$ ,  $\epsilon = 3.81 \times 10^3 \text{ L mol}^{-1} \text{ cm}^{-1}$ ;  $^1\text{H NMR}$  (400MHz,  $\text{CDCl}_3$ ):  $\delta$  8.39 (s, 1H,  $1 \times \text{CH}=\text{N}$ ), 7.82 (d,  $J = 8.8 \text{ Hz}$ , 2H, Ar), 7.19 (d,  $J = 8.8 \text{ Hz}$ , 2H, Ar), 6.97 (d,  $J = 8.8 \text{ Hz}$ , 2H, Ar), 6.91 (d,  $J = 8.8 \text{ Hz}$ , 2H, Ar), 5.37 (brd,  $J = 3.6 \text{ Hz}$ , 1H, olefinic), 4.66 (m, 1H,  $1 \times \text{CHOCO}$ ), 4.03 (m, 4H,  $2 \times \text{OCH}_2$ ), 2.39-2.30 (m, 4H,  $2 \times$  allylic  $\text{CH}_2$ ), 2.03-0.68 (m, 64H,  $6 \times \text{CH}$ ,  $20 \times \text{CH}_2$ ,  $6 \times \text{CH}_3$ );  $^{13}\text{C NMR}$  (100MHz): 172.9, 161.6, 157.9, 157.3, 145.3, 139.7, 130.2, 129.3, 122.6, 122.0, 115.0, 114.7, 73.9, 68.2, 67.7, 56.7, 56.2, 50.1, 42.3, 39.8, 39.5, 38.2, 37.0, 36.6, 36.2, 35.8, 34.3, 31.9, 29.6, 29.4, 29.3, 29.2, 28.7, 28.2, 28.0, 27.8, 26.0, 24.3, 23.8, 22.8, 22.7, 22.6, 21.8, 21.0, 19.3, 18.7, 14.1, 11.9; Anal. calcd for  $\text{C}_{55}\text{H}_{83}\text{NO}_4$ : C, 80.34; H, 10.17; N, 1.70; Found: C, 80.54; H, 10.03; N, 1.88.

**DSB-4,12:** Cholesteryl 5-(4-((4-dodecyloxybenzylidene)amino)phenoxy)pentanoate

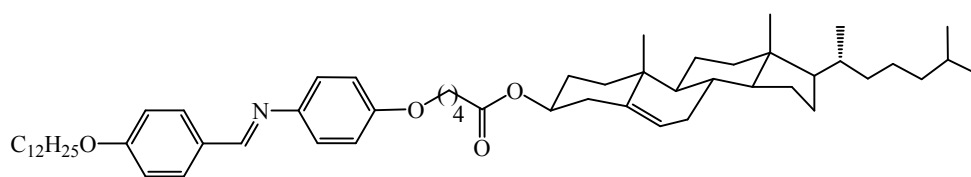

Yield: 0.070g, 68%; IR (Neat):  $\nu_{\max}$  in  $\text{cm}^{-1}$  2935, 2852, 1736, 1606, 1171, 1108; UV-Vis:  $\lambda_{\max} = 336 \text{ nm}$ ,  $\epsilon = 3.79 \times 10^3 \text{ L mol}^{-1} \text{ cm}^{-1}$ ;  $^1\text{H NMR}$  (400MHz,  $\text{CDCl}_3$ ):  $\delta$  8.39 (s, 1H, 1  $\times$  CH=N), 7.82 (d,  $J = 8.8 \text{ Hz}$ , 2H, Ar), 7.19 (d,  $J = 8.8 \text{ Hz}$ , 2H, Ar), 6.97 (d,  $J = 8.8 \text{ Hz}$ , 2H, Ar), 6.91 (d,  $J = 9.2 \text{ Hz}$ , 2H, Ar), 5.37 (brd,  $J = 3.6 \text{ Hz}$ , 1H, olefinic), 4.66 (m, 1H, 1  $\times$  CHOCO), 4.03 (m, 4H, 2  $\times$  OCH<sub>2</sub>), 2.39-2.30 (m, 4H, 2  $\times$  allylic CH<sub>2</sub>), 2.03-0.68 (m, 68H, 6  $\times$  CH, 22  $\times$  CH<sub>2</sub>, 6  $\times$  CH<sub>3</sub>);  $^{13}\text{C NMR}$  (100MHz): 172.9, 161.6, 157.9, 157.3, 145.3, 139.7, 130.2, 129.3, 122.6, 122.0, 115.0, 114.7, 73.9, 68.2, 67.7, 56.7, 56.2, 50.1, 42.3, 39.8, 39.5, 38.2, 37.0, 36.6, 36.2, 35.8, 34.3, 31.9, 29.7, 29.6, 29.4, 29.3, 29.2, 28.7, 28.2, 28.0, 27.8, 26.0, 24.3, 23.8, 22.8, 22.7, 22.6, 21.8, 21.0, 19.3, 18.7, 14.1, 11.9; Anal. calcd for  $\text{C}_{57}\text{H}_{87}\text{NO}_4$ : C, 82.06; H, 10.51; N, 1.68; Found: C, 81.63; H, 10.12; N, 2.13.

**DSB-5,4:** Cholesteryl 6-(4-((4-butoxybenzylidene)amino)phenoxy)hexanoate

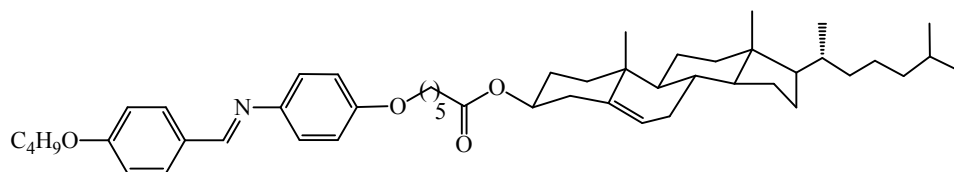

Yield: 0.045g, 72%; IR (Neat):  $\nu_{\max}$  in  $\text{cm}^{-1}$  2935, 2852, 1736, 1606, 1171, 1108; UV-Vis:  $\lambda_{\max} = 335 \text{ nm}$ ,  $\epsilon = 8.49 \times 10^3 \text{ L mol}^{-1} \text{ cm}^{-1}$ ;  $^1\text{H NMR}$  (400MHz,  $\text{CDCl}_3$ ):  $\delta$  8.39 (s, 1H, 1  $\times$  CH=N), 7.82 (d,  $J = 8.8 \text{ Hz}$ , 2H, Ar), 7.19 (d,  $J = 8.8 \text{ Hz}$ , 2H, Ar), 6.97 (d,  $J = 8.8 \text{ Hz}$ , 2H, Ar), 6.91 (d,  $J = 8.8 \text{ Hz}$ , 2H, Ar), 5.38 (brd,  $J = 4 \text{ Hz}$ , 1H, olefinic), 4.63 (m, 1H, 1  $\times$  CHOCO), 4.04 (m, 4H, 2  $\times$  OCH<sub>2</sub>), 2.34-2.30 (m, 4H, 2  $\times$  allylic CH<sub>2</sub>), 2.02-0.68 (m, 54H, 6  $\times$  CH, 15  $\times$  CH<sub>2</sub>, 6  $\times$  CH<sub>3</sub>);  $^{13}\text{C NMR}$  (100MHz): 173.04, 161.6, 157.9, 157.4, 145.2, 139.7, 130.2, 129.3, 122.6, 122.0, 115.0, 114.7, 73.8, 67.9, 56.7, 56.2, 50.1, 42.3, 39.8, 39.5, 38.2, 37.0, 36.6, 36.2, 35.8, 34.6, 31.9, 31.2, 29.0, 28.2, 28.0, 27.8, 25.6, 24.8, 24.3, 23.8, 22.8, 22.6, 21.0, 19.3, 19.2, 18.7, 13.8, 11.9; Anal. calcd for  $\text{C}_{50}\text{H}_{73}\text{NO}_4$ : C, 79.85; H, 9.78; N, 1.86; Found: C, 80.30; H, 9.61; N, 2.31.

**DSB-5,6:** Cholesteryl 6-(4-((4-hexylbenzylidene)amino)phenoxy)hexanoate.

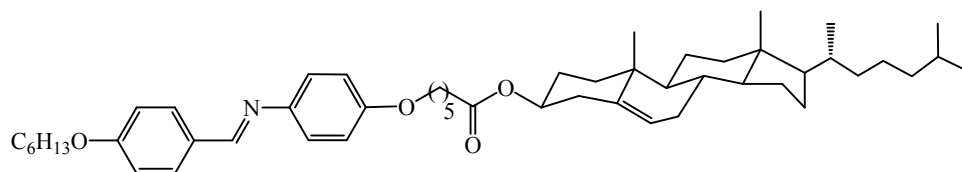

Yield: 0.043g, 66%; IR (Neat):  $\nu_{\max}$  in  $\text{cm}^{-1}$  2937, 2857, 1735, 1606, 1169, 1111; UV-Vis:  $\lambda_{\max} = 337 \text{ nm}$ ,  $\epsilon = 1.7 \times 10^3 \text{ L mol}^{-1} \text{ cm}^{-1}$ ;  $^1\text{H NMR}$  (400MHz,  $\text{CDCl}_3$ ):  $\delta$  8.39 (s, 1H, 1  $\times$  CH=N), 7.82 (d,  $J = 8.8 \text{ Hz}$ , 2H, Ar), 7.19 (d,  $J = 8.8 \text{ Hz}$ , 2H, Ar), 6.97 (d,  $J = 8.8 \text{ Hz}$ , 2H, Ar), 6.91 (d,  $J = 8.8 \text{ Hz}$ , 2H, Ar), 5.38 (brd,  $J = 4.4 \text{ Hz}$ , 1H, olefinic), 4.63 (m, 1H, 1  $\times$  CHOCO), 4.03 (m, 4H, 2  $\times$  OCH<sub>2</sub>), 2.34-2.30 (m, 4H, 2  $\times$  allylic CH<sub>2</sub>), 2.02-0.68 (m, 58H, 6  $\times$  CH, 17  $\times$  CH<sub>2</sub>, 6  $\times$  CH<sub>3</sub>);  $^{13}\text{C NMR}$  (100MHz): 173.0, 161.6, 157.9, 157.4, 145.2, 139.7, 130.2, 129.3, 122.6, 122.0, 115.0, 114.7, 73.8, 68.2, 67.9, 56.7, 56.2, 50.1, 42.3, 39.8, 39.6, 38.2, 37.0, 36.6, 36.2, 35.8, 34.6, 31.9, 31.6, 29.2, 29.0, 28.2, 28.0, 27.8, 25.7, 25.6, 24.8, 24.3, 23.8, 22.8, 22.6, 21.0, 19.3, 18.7, 14.0, 11.9; Anal. calcd for  $\text{C}_{52}\text{H}_{77}\text{NO}_4$ : C, 80.05; H, 9.95; N, 1.80; Found: C, 80.35; H, 10.21; N, 2.33.

**DSB-5,8:** Cholesteryl 6-(4-((4-octyloxybenzylidene)amino)phenoxy)hexanoate.

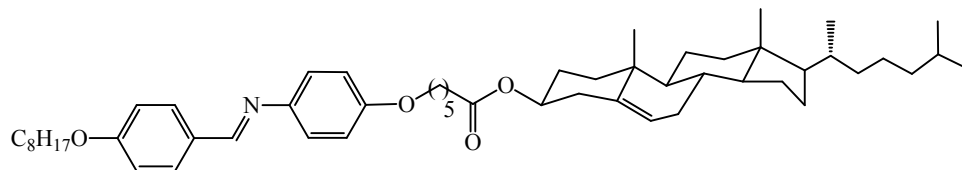

Yield: 0.046g, 68%; IR (Neat):  $\nu_{\max}$  in  $\text{cm}^{-1}$  2935, 2852, 1736, 1606, 1171, 1108; UV-Vis:  $\lambda_{\max} = 335 \text{ nm}$ ,  $\epsilon = 2.15 \times 10^3 \text{ L mol}^{-1} \text{ cm}^{-1}$ ;  $^1\text{H NMR}$  (400MHz,  $\text{CDCl}_3$ ):  $\delta$  8.39 (s, 1H, 1  $\times$  CH=N), 7.82 (d,  $J = 8.8 \text{ Hz}$ , 2H, Ar), 7.19 (d,  $J = 9.2 \text{ Hz}$ , 2H, Ar), 6.97 (d,  $J = 8.8 \text{ Hz}$ , 2H, Ar), 6.91 (d,  $J = 8.8 \text{ Hz}$ , 2H, Ar), 5.38 (brd,  $J = 4.0 \text{ Hz}$ , 1H, olefinic), 4.63 (m, 1H, 1  $\times$  CHOCO), 4.03 (m, 4H, 2  $\times$  OCH<sub>2</sub>), 2.34-2.30 (m, 4H, 2  $\times$  allylic CH<sub>2</sub>), 2.02-0.68 (m, 62H, 6  $\times$  CH, 19  $\times$  CH<sub>2</sub>, 6  $\times$  CH<sub>3</sub>);  $^{13}\text{C NMR}$  (100MHz): 173.1, 161.7, 157.9, 157.4, 145.3, 139.7, 130.2, 129.3, 122.6, 122.1, 115.0, 114.7, 73.9, 68.2, 68.0, 56.7, 56.2, 50.1, 42.4, 39.8, 39.5, 38.2, 37.0, 36.6, 36.2, 35.8, 34.6, 31.9, 31.8, 29.4, 29.2, 29.0, 28.3, 28.0, 27.9, 26.1, 25.7, 24.8, 24.3, 23.9, 22.9, 22.8, 22.7, 22.6, 22.5, 21.1, 19.3, 18.7, 14.1, 11.9; Anal. calcd for  $\text{C}_{54}\text{H}_{81}\text{NO}_4$ : C, 80.25; H, 10.10; N, 1.73; Found: C, 80.01; H, 10.30; N, 1.94.

**DSB-5,10:** Cholesteryl 6-(4-((4-decyloxybenzylidene)amino)phenoxy)hexanoate

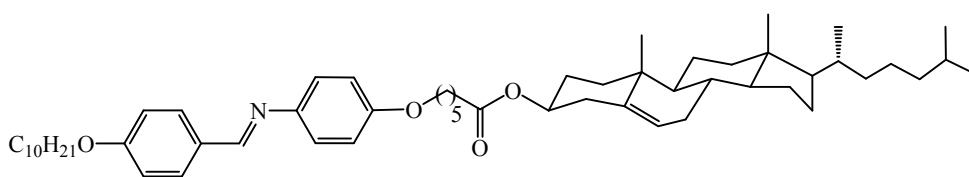

Yield: 0.050g, 71%; IR (Neat):  $\nu_{\max}$  in  $\text{cm}^{-1}$  2935, 2852, 1736, 1606, 1171, 1108; UV-Vis:  $\lambda_{\max} = 350 \text{ nm}$ ,  $\epsilon = 4.45 \times 10^3 \text{ L mol}^{-1} \text{ cm}^{-1}$ ;  $^1\text{H NMR}$  (400MHz,  $\text{CDCl}_3$ ) :  $\delta$  8.39 (s, 1H,  $1 \times \text{CH}=\text{N}$ ), 7.82 (d,  $J = 8.8 \text{ Hz}$ , 2H, Ar), 7.19 (d,  $J = 8.8 \text{ Hz}$ , 2H, Ar), 6.97 (d,  $J = 8.8 \text{ Hz}$ , 2H, Ar), 6.91 (d,  $J = 8.8 \text{ Hz}$ , 2H, Ar), 5.38 (brd,  $J = 4.0 \text{ Hz}$ , 1H, olefinic), 4.63 (m, 1H,  $1 \times \text{CHOCO}$ ), 4.03 (m, 4H,  $2 \times \text{OCH}_2$ ), 2.34-2.30 (m, 4H,  $2 \times$  allylic  $\text{CH}_2$ ), 2.02-0.68 (m, 66H,  $6 \times \text{CH}$ ,  $21 \times \text{CH}_2$ ,  $6 \times \text{CH}_3$ );  $^{13}\text{C NMR}$  (100MHz): 173.1, 161.7, 157.9, 157.4, 145.3, 139.7, 130.2, 129.3, 122.6, 122.1, 115.0, 114.7, 73.9, 68.2, 68.0, 56.7, 56.2, 50.1, 42.4, 39.8, 39.6, 38.2, 37.0, 36.6, 36.2, 35.8, 34.6, 31.9, 29.6, 29.4, 29.3, 29.2, 29.0, 28.3, 28.0, 27.9, 26.0, 25.7, 24.8, 24.3, 23.9, 22.8, 22.7, 22.6, 21.1, 19.3, 18.7, 14.1, 11.9; Anal. calcd for  $\text{C}_{56}\text{H}_{85}\text{NO}_4$ : C, 80.43; H, 10.24; N, 1.67; Found: C, 80.70; H, 10.40; N, 1.72.

**DSB-5,12:** Cholesteryl 6-(4-((4-dodecyloxybenzylidene)amino)phenoxy)hexanoate

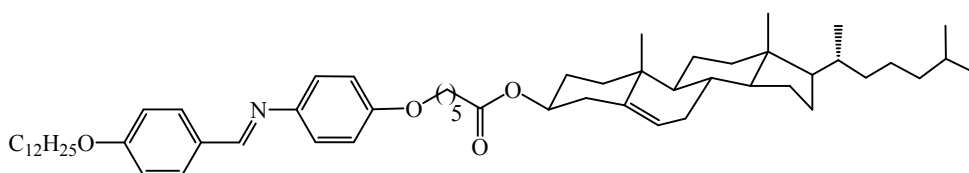

Yield: 0.058g, 80%; IR (Neat):  $\nu_{\max}$  in  $\text{cm}^{-1}$  2935, 2852, 1736, 1606, 1171, 1108; UV-Vis:  $\lambda_{\max} = 336 \text{ nm}$ ,  $\epsilon = 1.73 \times 10^3 \text{ L mol}^{-1} \text{ cm}^{-1}$ ;  $^1\text{H NMR}$  (400MHz,  $\text{CDCl}_3$ ) :  $\delta$  8.39 (s, 1H,  $1 \times \text{CH}=\text{N}$ ), 7.82 (d,  $J = 8.8 \text{ Hz}$ , 2H, Ar), 7.19 (d,  $J = 8.8 \text{ Hz}$ , 2H, Ar), 6.97 (d,  $J = 8.8 \text{ Hz}$ , 2H, Ar), 6.91 (d,  $J = 8.8 \text{ Hz}$ , 2H, Ar), 5.38 (brd,  $J = 4.0 \text{ Hz}$ , 1H, olefinic), 4.63 (m, 1H,  $1 \times \text{CHOCO}$ ), 4.03 (m, 4H,  $2 \times \text{OCH}_2$ ), 2.34-2.30 (m, 4H,  $2 \times$  allylic  $\text{CH}_2$ ), 2.02-0.68 (m, 70H,  $6 \times \text{CH}$ ,  $23 \times \text{CH}_2$ ,  $6 \times \text{CH}_3$ );  $^{13}\text{C NMR}$  (100MHz): 173.1, 161.7, 157.9, 157.4, 145.3, 139.7, 130.2, 129.3, 122.6, 122.0, 115.0, 114.7, 73.8, 68.2, 67.9, 56.7, 56.2, 50.1, 42.3, 39.8, 39.5, 38.2, 37.0, 36.6, 36.2, 35.8, 34.6, 31.9, 29.7, 29.6, 29.4, 29.2, 29.0, 28.2, 28.0, 27.8, 26.0, 25.6, 24.8, 24.3, 23.8, 22.8, 22.6, 21.0, 19.3, 18.7, 14.1, 11.9; Anal. calcd for  $\text{C}_{58}\text{H}_{89}\text{NO}_4$ : C, 80.60; H, 10.38; N, 1.62; Found: C, 81.03; H, 10.36; N, 1.78.

**DSB-7,4:** Cholesteryl 8-(4-((4-butoxybenzylidene)amino)phenoxy)octanoate



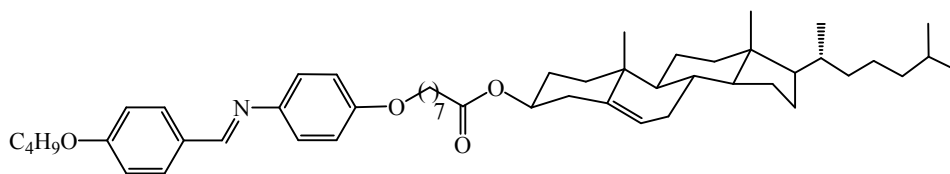

Yield: 0.064g, 78%; IR (Neat):  $\nu_{\max}$  in  $\text{cm}^{-1}$  2935, 2852, 1736, 1606, 1171, 1108; UV-Vis:  $\lambda_{\max} = 335 \text{ nm}$ ,  $\epsilon = 1.85 \times 10^3 \text{ L mol}^{-1} \text{ cm}^{-1}$ ;  $^1\text{H NMR}$  (400MHz,  $\text{CDCl}_3$ ):  $\delta$  8.39 (s, 1H, 1  $\times$  CH=N), 7.82 (d,  $J = 8.8 \text{ Hz}$ , 2H, Ar), 7.19 (d,  $J = 8.8 \text{ Hz}$ , 2H, Ar), 6.97 (d,  $J = 8.8 \text{ Hz}$ , 2H, Ar), 6.91 (d,  $J = 8.8 \text{ Hz}$ , 2H, Ar), 5.38 (brd,  $J = 4.8\text{Hz}$ , 1H, olefinic), 4.63 (m, 1H, 1  $\times$  CHOCO), 4.03 (m, 4H, 2  $\times$  OCH<sub>2</sub>), 2.32-2.26 (m, 4H, 2  $\times$  allylic CH<sub>2</sub>), 2.02-0.68 (m, 58H, 6  $\times$  CH, 17  $\times$  CH<sub>2</sub>, 6  $\times$  CH<sub>3</sub>);  $^{13}\text{C NMR}$  (100MHz): 173.0, 161.6, 157.9, 157.4, 145.2, 139.7, 130.2, 129.3, 122.6, 122.0, 115.0, 114.7, 73.8, 67.9, 56.7, 56.2, 50.1, 42.3, 39.6, 39.5, 38.2, 37.0, 36.6, 36.2, 35.8, 34.6, 31.9, 31.2, 29.0, 28.2, 28.0, 27.8, 25.6, 24.8, 24.3, 23.8, 22.8, 22.6, 21.0, 19.3, 19.2, 18.7, 13.8, 11.9; Anal. calcd for  $\text{C}_{52}\text{H}_{77}\text{NO}_4$ : C, 80.05; H, 9.95; N, 1.80; Found: C, 80.06; H, 10.29; N, 1.97.

**DSB-7,6:** Cholesteryl 8-(4-((4-hexyloxy)benzylidene)amino)phenoxy)octanoate

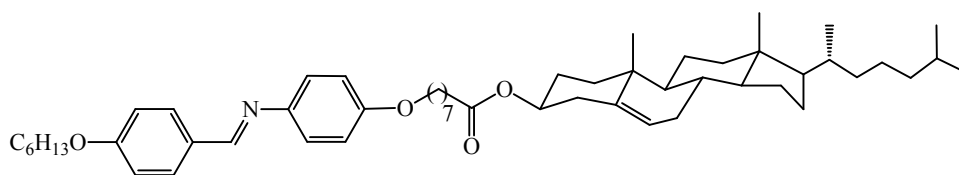

Yield: 0.060g, 71%; IR (Neat):  $\nu_{\max}$  in  $\text{cm}^{-1}$  2935, 2852, 1736, 1606, 1171, 1108; UV-Vis:  $\lambda_{\max} = 335 \text{ nm}$ ,  $\epsilon = 1.51 \times 10^3 \text{ L mol}^{-1} \text{ cm}^{-1}$ ;  $^1\text{H NMR}$  (400MHz,  $\text{CDCl}_3$ ):  $\delta$  8.39 (s, 1H, 1  $\times$  CH=N), 7.82 (d,  $J = 8.8 \text{ Hz}$ , 2H, Ar), 7.19 (d,  $J = 8.8 \text{ Hz}$ , 2H, Ar), 6.97 (d,  $J = 8.8 \text{ Hz}$ , 2H, Ar), 6.91 (d,  $J = 9.2 \text{ Hz}$ , 2H, Ar), 5.38 (brd,  $J = 4.4 \text{ Hz}$ , 1H, olefinic), 4.63 (m, 1H, 1  $\times$  CHOCO), 4.03 (m, 4H, 2  $\times$  OCH<sub>2</sub>), 2.32-2.26 (m, 4H, 2  $\times$  allylic CH<sub>2</sub>), 2.17-0.68 (m, 62H, 6  $\times$  CH, 19  $\times$  CH<sub>2</sub>, 6  $\times$  CH<sub>3</sub>);  $^{13}\text{C NMR}$  (100MHz): 173.0, 161.6, 157.9, 157.4, 145.2, 139.7, 130.2, 129.3, 122.6, 122.0, 115.0, 114.7, 73.8, 68.2, 67.9, 56.7, 56.2, 50.1, 42.3, 39.7, 39.5, 38.2, 37.0, 36.6, 36.2, 35.8, 34.6, 31.9, 31.6, 29.2, 29.0, 28.2, 28.0, 27.8, 25.7, 25.6, 24.8, 24.3, 23.8, 22.8, 22.6, 22.5, 21.0, 19.3, 18.7, 14.0, 11.9; Anal. calcd for  $\text{C}_{54}\text{H}_{81}\text{NO}_4$ : C, 80.25; H, 10.10; N, 1.73; Found: C, 80.58; H, 10.43; N, 1.98.

**DSB-7,8:** Cholesteryl 8-(4-((4-octyloxy)benzylidene)amino)phenoxy)octanoate

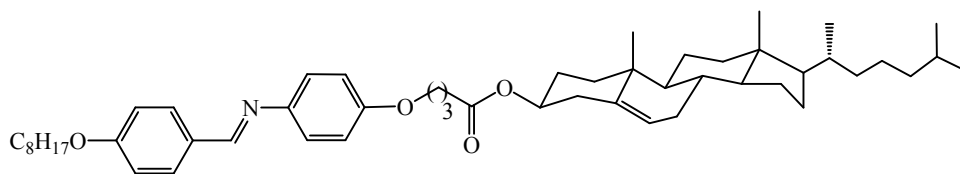

Yield: 0.066g, 75%; IR (Neat):  $\nu_{\max}$  in  $\text{cm}^{-1}$  2921, 2850, 1734, 1604, 1168, 1112; UV-Vis:  $\lambda_{\max} = 337 \text{ nm}$ ,  $\epsilon = 1.85 \times 10^3 \text{ L mol}^{-1} \text{ cm}^{-1}$ ;  $^1\text{H NMR}$  (400MHz,  $\text{CDCl}_3$ ) :  $\delta$  8.39 (s, 1H,  $1 \times \text{CH}=\text{N}$ ), 7.82 (d,  $J = 8.8 \text{ Hz}$ , 2H, Ar), 7.19 (d,  $J = 8.8 \text{ Hz}$ , 2H, Ar), 6.97 (d,  $J = 8.8 \text{ Hz}$ , 2H, Ar), 6.91 (d,  $J = 8.8 \text{ Hz}$ , 2H, Ar), 5.38 (brd,  $J = 4.8 \text{ Hz}$ , 1H, olefinic), 4.63 (m, 1H,  $1 \times \text{CHOCO}$ ), 4.03 (m, 4H,  $2 \times \text{OCH}_2$ ), 2.32-2.26 (m, 4H,  $2 \times$  allylic  $\text{CH}_2$ ), 2.02-0.68 (m, 66H,  $6 \times \text{CH}$ ,  $21 \times \text{CH}_2$ ,  $6 \times \text{CH}_3$ );  $^{13}\text{C NMR}$  (100MHz): 173.0, 161.6, 157.9, 157.4, 145.2, 139.7, 130.2, 129.3, 122.6, 122.0, 115.0, 114.7, 73.8, 67.9, 56.7, 56.2, 50.1, 42.3, 39.8, 39.5, 38.2, 37.0, 36.6, 36.2, 35.8, 34.6, 31.9, 31.2, 29.0, 28.2, 28.0, 27.8, 25.6, 24.8, 24.3, 23.8, 22.8, 22.6, 21.0, 19.3, 19.2, 18.7, 13.8, 11.9; Anal. calcd for  $\text{C}_{56}\text{H}_{85}\text{NO}_4$ : C, 80.43; H, 10.24; N, 1.67; Found: C, 80.72; H, 10.52; N, 1.54.

**DSB-7,10:** Cholesteryl 8-(4-((4-decyloxybenzylidene)amino)phenoxy)octanoate

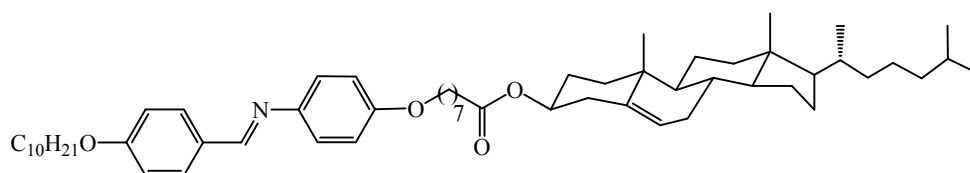

Yield: 0.072g, 79%; IR (Neat):  $\nu_{\max}$  in  $\text{cm}^{-1}$  2921, 2850, 1736, 1605, 1170, 1109; UV-Vis:  $\lambda_{\max} = 336 \text{ nm}$ ,  $\epsilon = 1.90 \times 10^3 \text{ L mol}^{-1} \text{ cm}^{-1}$ ;  $^1\text{H NMR}$  (400MHz,  $\text{CDCl}_3$ ) :  $\delta$  8.39 (s, 1H,  $1 \times \text{CH}=\text{N}$ ), 7.82 (d,  $J = 8.8 \text{ Hz}$ , 2H, Ar), 7.19 (d,  $J = 8.8 \text{ Hz}$ , 2H, Ar), 6.97 (d,  $J = 8.8 \text{ Hz}$ , 2H, Ar), 6.91 (d,  $J = 9.2 \text{ Hz}$ , 2H, Ar), 5.38 (brd,  $J = 4.4 \text{ Hz}$ , 1H, olefinic), 4.63 (m, 1H,  $1 \times \text{CHOCO}$ ), 4.03 (m, 4H,  $2 \times \text{OCH}_2$ ), 2.32-2.26 (m, 4H,  $2 \times$  allylic  $\text{CH}_2$ ), 2.16-0.68 (m, 70H,  $6 \times \text{CH}$ ,  $23 \times \text{CH}_2$ ,  $6 \times \text{CH}_3$ );  $^{13}\text{C NMR}$  (100MHz): 172.9, 161.7, 157.9, 157.3, 145.3, 139.7, 130.2, 129.3, 122.7, 122.1, 115.0, 114.7, 73.9, 68.2, 67.7, 56.7, 56.2, 50.1, 42.4, 39.8, 39.6, 38.2, 37.0, 36.6, 36.2, 35.8, 34.4, 31.9, 31.6, 29.2, 28.7, 28.3, 28.0, 27.9, 25.7, 24.3, 23.9, 22.8, 22.6, 21.8, 21.1, 19.4, 18.7, 14.0, 11.9; Anal. calcd for  $\text{C}_{58}\text{H}_{89}\text{NO}_4$ : C, 80.60; H, 10.38; N, 1.62; Found: C, 80.41; H, 10.21; N, 1.59.

**DSB-7,12:** Cholesteryl 8-(4-((4-dodecyloxybenzylidene)amino)phenoxy)octanoate

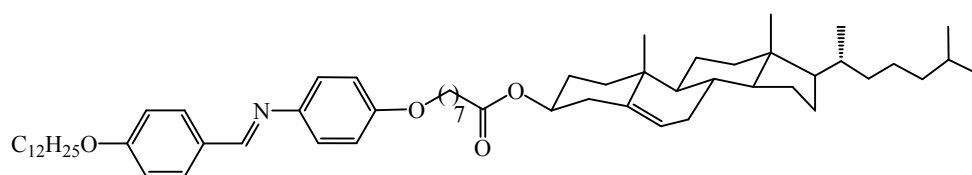

Yield: 0.064g, 68%; IR (Neat):  $\nu_{\max}$  in  $\text{cm}^{-1}$  2921, 2850, 1736, 1605, 1170, 1109; UV-Vis:  $\lambda_{\max} = 337 \text{ nm}$ ,  $\epsilon = 2.05 \times 10^3 \text{ L mol}^{-1} \text{ cm}^{-1}$ ;  $^1\text{H NMR}$  (400MHz,  $\text{CDCl}_3$ ):  $\delta$  8.39 (s, 1H, 1  $\times$  CH=N), 7.82 (d,  $J = 8.4 \text{ Hz}$ , 2H, Ar), 7.19 (d,  $J = 9.2 \text{ Hz}$ , 2H, Ar), 6.97 (d,  $J = 8.8 \text{ Hz}$ , 2H, Ar), 6.91 (d,  $J = 8.8 \text{ Hz}$ , 2H, Ar), 5.38 (brd,  $J = 4.8 \text{ Hz}$ , 1H, olefinic), 4.63 (m, 1H, 1  $\times$  CHOCO), 4.03 (m, 4H, 2  $\times$  OCH<sub>2</sub>), 2.32-2.26 (m, 4H, 2  $\times$  allylic CH<sub>2</sub>), 2.02-0.68 (m, 74H, 6  $\times$  CH, 25  $\times$  CH<sub>2</sub>, 6  $\times$  CH<sub>3</sub>);  $^{13}\text{C NMR}$  (100MHz): 172.9, 161.6, 157.9, 157.3, 145.3, 139.7, 130.2, 129.3, 122.6, 122.0, 115.0, 114.7, 73.9, 68.2, 67.7, 56.7, 56.2, 50.0, 42.3, 39.7, 39.5, 38.2, 37.0, 36.6, 36.2, 35.8, 34.3, 31.9, 31.8, 29.3, 29.2, 28.7, 28.2, 28.0, 27.8, 26.0, 24.3, 23.8, 22.8, 22.6, 21.7, 21.0, 19.3, 18.7, 14.1, 11.9; Anal. calcd for C<sub>60</sub>H<sub>93</sub>NO<sub>4</sub>: C, 80.75; H, 10.50; N, 1.57; Found: C, 81.03; H, 10.81; N, 1.96.

**Table S1:** Phase transition temperatures ( $^{\circ}\text{C}$ )<sup>a</sup> and enthalpies of transitions ( $\text{kJ mol}^{-1}$ ) of intermediates

| Compounds | Phase Sequence                                                |
|-----------|---------------------------------------------------------------|
|           | Heating                                                       |
|           | Cooling                                                       |
| <b>2a</b> | Cr 133.6 (20.5) I                                             |
|           | I 130.3 (0.6) N* 117.2 (0.6) <sup>b</sup> TGB-SmA 89 (1.2) Cr |
| <b>2b</b> | Cr 106.9 (0.5) N* 125 (0.6) I                                 |
|           | I 123.9 (0.7) N* 113.2 <sup>c</sup> TGB-SmA 106 (0.5) Cr      |
| <b>2c</b> | Cr 136.3 (19.1) I                                             |
|           | I 124.4 (0.7) N* 102.4 (11.3) Cr                              |
| <b>2d</b> | Cr 94 (0.5) N* 106.8 (2) I                                    |
|           | I 106.4 (1.2) N* 54.0 <sup>c</sup> Cr                         |
| <b>3a</b> | Cr 120.9 (17) SmA-TGB-N* 126.6 (2) I                          |
|           | I 125.7 (1.6) N*-TGB 124.2 (0.8) SmA 99.6 (21.1) Cr           |
| <b>3b</b> | Cr 121.7 (24.6) SmA-TGB-N* 127.9 (2.3) I                      |
|           | I 126.9 (2.4) N*-TGB-SmA 102.7 (21.4) Cr                      |
| <b>3c</b> | Cr 94.6 (16.9) SmA-TGB-N* 105 (1) I                           |
|           | I 104 (0.8) N*-TGB 98.4 (0.4) SmA 50.0 (11.5) Cr              |
| <b>3d</b> | Cr 108.26 (34.7) SmA-TGB-N* 112.65 (1.1) I                    |
|           | I 111.74 (1.1) N*-TGB 100.2 SmA 66.90 (22.5) Cr               |

<sup>a</sup> Transition temperatures determined by both POM and peak values of the DSC traces during the first heating/cooling cycles at 5 °C /min rate. <sup>b</sup> TGB-N\* transition was observed under the microscope, but this was not resolved in the DSC scan and hence the  $\Delta H$  value represents the combined enthalpy for both TGB-N\* transition. <sup>c</sup> The transitions were observed under the microscope, but this was not resolved in the DSC scan.

The nitro compounds **2a-d** show the N\* phase commonly; it is enantiotropic only in the case of dimers **2b** and **2d**. Compounds **2a** and **2b** show monotropic TGB and SmA phases

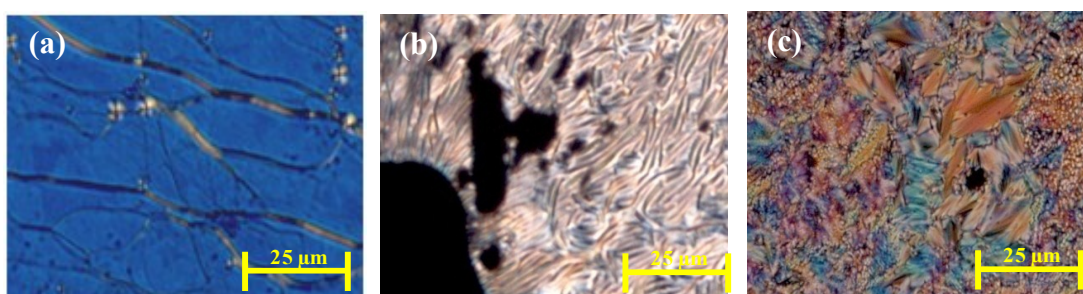

**Figure S1.** Photomicrographs of the optical textures of LC phases obtained for **IV-2a**: (a) the Grandjean planar texture of N\* phase (129 °C), (b) the filament texture of the TGB phase (114 °C) and (c) focal-conic texture of the homogeneously aligned SmA phase (100 °C).

compounds also the TGB phase exist over a very short thermal range. The existence of these mesophases was clearly identified by observing their characteristic textural patterns under POM. For example, when a sample of compound **2a** was held between two untreated glass

slides and cooled slowly from the isotropic state, a focal-conic texture of the N\* phase was observed; when pressed gently, the textural pattern sharply changes to a Grandjean planar pattern<sup>23</sup> as shown in Fig. 1a. On cooling the unperturbed sample, at 117.2 °C the field of view fills with a pattern consisting of both filament and planar textures which is the characteristic of the TGB phase (Fig. 1b).<sup>23</sup> On cooling further, the pattern immediately changes to a focal-conic fan coexistent with a *pseudo*-isotropic texture, which is typical of the SmA phase. The existence of the SmA phase was further evidenced based on the observation of a characteristic focal-conic texture (Fig. 1c) in slides treated for planar orientation and a dark field of view for slides treated for homeotropic orientation. Four series of target dimers were examined for their phase transitional properties and the details of these studies with analysis of the results are presented in the following sections.

**Table S2:** The all-*trans* molecular length [ $L$  (Å)] and the spacings  $d_l$  corresponding to the low-angle reflections of XRD pattern of SmX phase belonging to dimer **DSB-4,8**;  $d_l/L$  ratio is also given.

| Dimer [ $L$ (Å)]    | Temperature (°C) | $d_l$ (Å) Layer spacing | $d_l/L$ |
|---------------------|------------------|-------------------------|---------|
| <b>DSB-4,8</b> (42) | 90               | 39.7                    | 0.95    |
|                     | 95               | 40.3                    | 0.96    |
|                     | 100              | 40.9                    | 0.97    |
|                     | 105              | 41.8                    | 1.0     |
|                     | 110              | 42.6                    | 1.01    |
|                     | 115              | 43.5                    | 1.03    |
|                     | 120              | 44.8                    | 1.07    |

**Table S3:** The all-*trans* molecular length [ $L$  (Å)], the spacings  $d_l$  corresponding to the low-angle reflections of XRD pattern of TGB and/or TGBC\* phases of dimers **DSB-7,10** and **DSB-7,12**;  $d_l/L$  ratio is also given.

| Dimer<br>[ $L$ (Å)]       | LC phase | Temperature / °C | $d_l$ (Layer spacing) | $d_l / L$ |
|---------------------------|----------|------------------|-----------------------|-----------|
| <b>DSB-7,10</b><br>[52.2] | TGB      | 145              | 52.36                 | 1.00      |
|                           |          | 143              | 52.67                 | 1.00      |
|                           |          | 141              | 52.71                 | 1.00      |
|                           |          | 139              | 52.22                 | 1.00      |
|                           |          | 137              | 51.58                 | 0.98      |
|                           |          | 135              | 52.17                 | 0.99      |
|                           |          | 133              | 52.47                 | 1.00      |
|                           | TGBC*    | 131              | 50.31                 | 0.96      |
|                           |          | 129              | 49.84                 | 0.95      |
|                           |          | 127              | 49.30                 | 0.94      |
|                           |          | 125              | 48.88                 | 0.93      |
|                           |          | 123              | 48.52                 | 0.92      |
|                           |          | 121              | 48.24                 | 0.92      |
|                           |          | 119              | 47.59                 | 0.91      |
|                           |          | 117              | 47.24                 | 0.90      |
|                           |          | 115              | 47.09                 | 0.90      |
|                           |          | 113              | 46.53                 | 0.89      |
|                           |          | 111              | 46.34                 | 0.88      |
| <b>DSB-7,12</b><br>[57.4] | TGBC*    | 154              | 55.11                 | 0.96      |
|                           |          | 152              | 54.94                 | 0.95      |
|                           |          | 150              | 55.09                 | 0.95      |
|                           |          | 148              | 55.05                 | 0.95      |
|                           |          | 146              | 54.99                 | 0.95      |
|                           |          | 144              | 55.03                 | 0.95      |
|                           |          | 142              | 55.07                 | 0.95      |
|                           |          | 140              | 54.74                 | 0.95      |
|                           |          | 138              | 53.67                 | 0.93      |
|                           |          | 136              | 52.86                 | 0.92      |
|                           |          | 134              | 52.21                 | 0.90      |
|                           |          | 132              | 51.68                 | 0.90      |
|                           |          | 130              | 51.16                 | 0.89      |
|                           |          | 128              | 50.69                 | 0.88      |
|                           |          | 126              | 50.24                 | 0.87      |
|                           |          | 124              | 49.78                 | 0.86      |
|                           |          | 122              | 49.41                 | 0.86      |
|                           |          | 120              | 49.10                 | 0.85      |
| 118                       | 48.66    | 0.84             |                       |           |
| 116                       | 48.29    | 0.84             |                       |           |
| 114                       | 47.92    | 0.83             |                       |           |
| 112                       | 47.61    | 0.82             |                       |           |
| 110                       | 47.25    | 0.82             |                       |           |

**Table S4:** Temperature-dependent CD data for the chiral nematic phase of dimers

| Dimer          | Phase                      | Temperature (°C)          | CD                         |                            |
|----------------|----------------------------|---------------------------|----------------------------|----------------------------|
|                |                            |                           | $\lambda_{\max}$ (nm)      | CD (mdeg)                  |
| <b>DSB-3,4</b> | I                          | 225                       | ---                        | ---                        |
|                | N*                         | 210                       | 456.5, 375.8, 314.1, 257.6 | 39.1, -300.2, -33.2, 44.3  |
|                |                            | 205                       | 456.4, 375.8, 314.4, 258.4 | 39.0, -297.1, -37.6, 33.3  |
|                |                            | 200                       | 455.0, 374.1, 313.1, 256.1 | 36.6, -285.1, -41.3, 40.3  |
|                |                            | 195                       | 455.5, 373.0, 315.7, 257.1 | 35.1, -286.7, -46.04, 44.6 |
|                |                            | 190                       | 456.5, 373.9, 314.3, 256.9 | 34.6, -281.9, -49.8, 51.2  |
|                |                            | 185                       | 456.5, 376.0, 215.0, 256.8 | 33.2, -280.2, -29.2, 34.5  |
|                |                            | 180                       | 456.5, 376.5, 310.6, 256.1 | 33.0, -281.7, -22.9, 34.4  |
|                |                            | 175                       | 456.0, 376.3, 310.7, 258.3 | 32.74, -277.3, -21.3, 33.3 |
| 170            | 460.0, 377.0, 310.5, 256.9 | 31.1, -269.2, -17.6, 26.4 |                            |                            |
| <b>DSB-4,4</b> | I                          | 175                       | ---                        | ---                        |
|                | N*                         | 165                       | 494.7, 405.4               | 64.43, 126.0               |
|                |                            | 155                       | 495.0, 405.3               | 63.16, 122.3               |
|                |                            | 145                       | 494.8, 405.3               | 61.11, 117.                |
|                |                            | 135                       | 496.0, 405.6               | 60.05, 114.2               |
|                |                            | 125                       | 495.9, 405.5               | 56.9, 107.1                |
|                |                            | 115                       | 496.4, 405.2               | 55.5, 103.2                |
|                |                            | 105                       | 496.4, 406.1               | 53.8, 99.6                 |
|                |                            | 95                        | 496.7, 406.1               | 51.9, 95.6                 |
| 85             | 496.2, 405.6               | 49.03, 88.6               |                            |                            |
| 75             | 496.1, 405.6               | 46.2, 82.8                |                            |                            |
| <b>DSB-5,4</b> | I                          | 210                       | ---                        | ---                        |
|                | N*                         | 205                       | 360.3, 309.1, 260.7        | -1732.3, -687.4, 527.5     |
|                |                            | 200                       | 361.9, 309.2, 260.7        | -1633.0, -608.6, 509.2     |
|                |                            | 195                       | 363.9, 309.4, 260.5        | -1540.6, -530.2, 472.3     |
|                |                            | 190                       | 365.6, 309.7, 261.0        | -1464.2, -468.9, 465.6     |
|                |                            | 185                       | 367.0, 309.0, 260.1        | -1415.0, -444.7, 444.3     |
|                |                            | 180                       | 366.0, 310.0, 260.5        | -1377.4, -433.8, 430.0     |
|                |                            | 175                       | 367.7, 310.2, 261.0        | -1341.7, 432.8, 422.5      |
|                |                            | 170                       | 367.8, 309.4, 260.5        | -1279.0, -410.3, 420.8     |
| <b>DSB-7,4</b> | I                          | 190                       | ---                        | ---                        |
|                | N*                         | 185                       | 599.8, 390.7, 257.1        | -20.7, -251.3, 17.0        |
|                |                            | 180                       | 601.7, 390.3, 257.8        | 4.9, -84.6, 9.3            |
|                |                            | 175                       | 598.6, 390.9, 257.0        | 21.6, -49.2, 6.6           |
|                |                            | 170                       | 598.2, 391.2, 256.8        | 34.2, -31.2, 5.6           |
| 165            | 598.1, 387.6, 257.4        | 44.9, -17.3, 4.8          |                            |                            |
